# Supplementary material for: Microtubule-mediated GLUT4 trafficking is disrupted in insulin-resistant skeletal muscle
Source: eLife journal article supplement (doi:10.7554/elife.83338), 2023-04-19
Supplement: fig2-data1 [file Figure_2_source_data_1.xlsx]

## Sheet: Figure 2 B
Basal	Insulin	Insulin+
9.88621	37.2901	6.31035
11.9316	23.9432	0
19.3647	16.477	4.23695
6.7406	22.4687	3.25204
18.1247	10.2714	6.17888
15.0059	25.4645	8.5226
15.1482	0	2.9365
16.477	31.3063	3.1891
19.1346	11.3516	6.02818
11.2985	33.4857	0
11.1618	17.2434	0
13.4812	8.43945	2.47155
13.0847	16.1774	3.02639
9.76416	9.99729	1.05173
22.0862	32.6245
30.9991	10.7459
25.8925	25.1207
21.4918	26.4399
23.8917	8.07038
20.1386	7.8049
15.8886	18.2114
24.7155	23.0227
22.3237	12.5422
12.7564	22.1139
7.52212	19.7724
0	8.23851
0	9.50597
1.41232	4.70772
5.20327	0
7.48955	9.1539
	14.6462

## Sheet: Figure 2 C
Basal	Insulin
0.96119	1.03622	Exp. 1
0.883067	1.1129	Exp. 2
0.884412	1.07706	Exp. 3
0.912897	1.09255	Exp. 4

## Sheet: Figure 2 E
Microtbule nucleation site clusters				Intermediate structures				Small structures
Basal	Nocodazole	Recovered		Basal	Nocodazole	Recovered		Basal	Nocodazole	Recovered
1	2	3		39.3939	191.943	58.2677		766.061	642.654	749.606
7	1	6		58.0271	167.024	70.3971		742.747	665.525	739.35
10	1	7		71.7629	221.127	70.442		730.109	621.972	735.912
7	4	1		78.7746	242.347	173.913		724.726	597.959	655.072
3	0	5		32.5814	125.227	70.5882		767.92	657.713	727.843
7	0	10		53.1401	79.7546	112.339		748.47	736.196	702.762
10	1	7		61.017	169.811	101.191		737.627	662.264	713.492
15	1	13		173.969	134.703	79.6253		645.361	691.324	711.944
7	0	1		63.7681	123.333	108.527		740.87	701.333	706.977
8		6		91.6335		93.6073		720.319		714.155
		5				96.7742				711.828

## Sheet: Figure 2 G
DMSO	Nocodazole
0.44	0.113
0.002	0.297
0.189	0.447
0.244	0.279
0.435	0.282
0.304	0.224
