# Supplementary material for: Microtubule-mediated GLUT4 trafficking is disrupted in insulin-resistant skeletal muscle
Source: eLife journal article supplement (doi:10.7554/elife.83338), 2023-04-19
Supplement: fig2-figsupp1-data1 [file Figure 2 - figure supplement 1 - source data 1.xlsx]

## Sheet: Figure 2 - fig. supp. 1 A
Basal	Insulin
0.676771	2.9921
0.582936	3.16732
0.595479	3.49068

## Sheet: Figure 2 - fig. supp. 1 B
DMSO	Nocodazole
0.967111	0.493971
1.91814	0.08302
1.41379	0.170003
1.74782	0.222916
3.15997	0.148684
2.93371	0.14746
1.17904	0.105748
0.892964	0.415647

## Sheet: Figure 2 - fig. supp. 1 C
DMSO	Nocodazole
0.347829	0.952892
0.981696	0.342115
0.498872	0.473453
1.27868	0.637914
1.37191	0.960183
0.660012	0.578315
0.821821	0.599908
3.61809	0.658801
1.25443	0.370255
1.36704	0.35918
3.36173	1.12736
0.826495	0.303622
1.08326
1.16415

## Sheet: Figure 2 - fig. supp. 1 D
Travel distance	Basal	Insulin	Insulin+Nocodazole		Displacement	Basal	Insulin	Insulin+Nocodazole
	106.225	274.079	39.0947			3.36725	3.73134	3.2735
	18.8605	194.503				3.6405	3.72619
	145.627	125.184	33.7501			3.48892	3.67394	3.40867
	40.0279	242.455	28.5464			3.282	3.66963	3.3682
	165.639	90.6675	57.1083			3.40075	3.66725	3.1405
	114.428	182.738	59.7451			3.58923	3.561	3.64
	130.522		23.3873			3.64811		3.318
	137.044	252.636	22.2328			3.38786	3.48158	3.327
	181.346	96.6475	49.7493			4.27137	3.31064	3.50125
	91.0817	344.997				3.45938	3.69118
	79.8686	152.296				3.26193	3.43813
	122.477	61.8334	26.3307			3.85517	4.56371	3.4545
	108.414	138.073	24.3564			3.82311	3.54289	3.17067
	92.0449	77.8989	7.49354			3.80156	3.51556	3.307
	164.668	327.565				3.66143	3.6977
	227.853	80.4279				3.50511	3.44707
	174.474	174.831				3.51618	3.4419
	137.713	205.308				3.60145	3.7593
	181.68	52.1316				3.62	3.44537
	170.576	66.8885				3.66027	3.34293
	111.156	147.847				3.39456	3.74457
	197.541	186.162				3.6147	3.64982
	191.517	109.014				3.43143	3.48953
	93.3163	187.294				3.35637	3.53671
	67.4272	175.805				3.61429	3.80857
		66.9939					3.4458
		90.4759					4.361
	11.0161	47.9128				3.54233	3.33525
	43.5514					3.2668
	47.3954	106.817					3.5112
		117.752					3.69975

## Sheet: Figure 2 - fig. supp. 1 G
Prevalence of GLUT4 structures	Basal	Nocodazole	Recovered		Total area of GLUT4 structures	Basal	Nocodazole	Recovered
	330	422	635			52.082	135.605	113.513
	517	934	1108			126.18	230.729	189.212
	641	710	724			171.712	233.436	168.177
	457	392	138			122.309	154.538	62.429
	399	551	255			73.652	107.67	79.078
	621	326	1086			139.984	50.732	285.511
	590	424	1008			203.919	129.312	229.724
	776	876	427			418.294	192.34	232.854
	690	300	129			158.242	51.587	31.886
	1004		438			251.491		118.87
			372					90.29
