# Supplementary material for: Microtubule-mediated GLUT4 trafficking is disrupted in insulin-resistant skeletal muscle
Source: eLife journal article supplement (doi:10.7554/elife.83338), 2023-04-19
Supplement: fig3-data1 [file elife-83338-fig3-data1-v2.zip]

## Sheet: Figure 3 A
SOL	DMSO	Noco 15 min.	Noco 40 min.	Noco 2h.	EDL	DMSO	Noco 15 min.	Noco 40 min.	Noco 2h.
Basal	0.653351	0.687843	0.909606	0.507578	Basal	0.737502	0.90538	0.335594	0.496178
	0.552164	0.874122	0.749186	0.849941		0.638572	0.627391	0.626598	0.704261
	0.85036	0.75566	0.748033	0.685488		0.696419	0.759193	0.657931	0.677113
	1.10448	0.750684	0.552801	1.04418		1.01073	0.675932	0.729491	0.774868
	1.00913	1.03035	1.2784	1.03249		1.16414	1.0686	1.04301	1.23283
	0.803734	1.0046	0.944826	0.848802		0.9682	1.01527	1.15892	0.952561
	0.950474	0.581337	0.994853	0.992445		1.19079	0.46888	1.15475	0.953691
	1.02198	0.921598	0.547039	0.433727		0.686144	0.510742	0.15611	0.305318
	0.693067	0.758236	0.75689	0.475302		0.741597	0.714131	0.424123	0.371
	0.617368	1.10913	0.919981	0.680416		1.40064	0.832989	0.623584	0.610003
	1.19541							0.449852	0.936318
Insulin	0.942352	0.787196	1.39178	0.587824	Insulin	1.00413	0.872752	0.740059	0.688356
	1.82488	1.37065	1.02117	0.825582		1.28925	0.831797	0.874881	0.602222
	2.10401	0.816212	1.15619	0.880542		1.00898	1.1783	0.605725	0.718139
	1.27153	1.40508	0.766188	1.21926		2.00611	0.941409	0.645525	0.675976
	1.23185	1.0488	1.38419	1.04629		1.15118	1.24152	1.07774	1.25006
	1.25705	1.42064	0.902342	0.980575		1.3	1.19695	1.20082	0.885567
	1.4	1.24215	1.01982	0.922922		2.03573	0.710578	1.2475	1.11317
	2.44107	2.12094	1.29104	1.55617		2.25882	1.37386	1.04289	0.531182
	3.51201	1.28059	1.07205	1.40989		1.49124	0.66246	1.06458	0.507066
	2.34211	2.65493	1.88228	1.28826		1.58828	0.88234	1.01377	0.760784
	3.50915							0.996343	1.39621

## Sheet: Figure 3 B
SOL	DMSO	Noco 15	Noco 40	Noco 2h.		EDL	DMSO	Noco 15	Noco 40	Noco 2h.
	0.289001	0.099353	0.482174	0.080246			0.266633	-0.03263	0.404465	0.192178
	1.27271	0.496531	0.271981	-0.02436			0.650678	0.204405	0.248283	-0.10204
	1.25365	0.060552	0.40816	0.195054			0.312562	0.419103	-0.05221	0.041026
	0.167052	0.654398	0.213387	0.175078			0.995382	0.265478	-0.08397	-0.09889
	0.222727	0.018453	0.105789	0.013801			0	0.172919	0.034726	0.017227
	0.45	0.416039	-0.04248	0.131773			0.287013	0.181683	0.0419	-0.06699
	0.427686	0.660819	0.024971	-0.06952			0.844945	0.241698	0.092741	0.159477
	1.41909	1.19934	0.743998	1.12244			1.57267	0.863113	0.886778	0.225864
	2.81894	0.522351	0.315158	0.934584			0.749644	-0.05167	0.640454	0.136066
	1.72474	1.5458	0.9623	0.607841			0.187639	0.049351	0.390182	0.150781
	2.31374								0.54649	0.459889

## Sheet: Figure 3 D
	DMSO	Noco 5	Noco 2h.
	1.40448	0.552467	0.572992
	2.25399	0.280894	0.808913
	2.28274	0.235366	0.285191
	2.51532	0.560234	0.175345
	1.93019	0.586773	0.281694
	2.29557	0.252011	0.42266
	2.09764	0.275665	0.428572
	2.54682	0.532964	0.544427
	1.30509		0.32245
	1.24955

## Sheet: Figure 3 E
Time	DMSO Basal									DMSO Insulin									Noco 5min. Basal							Noco 5min. Insulin							Noco 2h. Basal				Noco 2h. Insulin				Colchicine Basal						Colchicine Insulin
1	0.794007	-1.59542	0.66504	1.31691	0	0		0		0	0	0	0	0	0	0	0		-1.05437	0.991253	0.781363	1.77775	0.541132	2.34853		0	0	0	0	0	0		0.854697	0.816766	1.52485		0	0	0		0	0	0	0	0		0	0	0
3	-2.7912	-2.44234	1.42875	1.60049	0.154229	-0.05691		-0.16649		0.574005	-1.26928	-0.17447	-0.83178	-0.44419	0.074609	2.36969	-0.47813		-1.35777	-2.45245	1.52738	11.7416	-5.28345	-0.53146		-0.59167	-1.77492	-1.17573	-0.71304	-4.02223	-12.0236		1.77522	-0.60179	2.3569		0.0354	0.055629	-0.09356		0.002111	0.060179	1.74227	-1.32945	0.392825		-0.32858	-0.30465	-0.06617
5	-1.79262	-2.63952	2.04582	1.87084	0.60013	-0.08206		-0.11004		-0.40204	-1.36535	-0.06827	-3.45924	-0.95202	0.123608	4.30378	-1.01426		0.323664	1.28966	0.101144	4.98754	-10.1551	-0.5701		0.080915	-0.35905	-1.4058	-0.89003	-8.2931	-23.0406		1.48439	-2.13139	-1.06448		-1.29962	0.551247	0.543661		0.352955	-0.34048	4.21589	-2.25429	0.432687		-0.51344	-0.43649	-0.19884
7	-2.17942	-2.70778	1.11264	0.372598	0.627057	-0.13281		-0.14823		-0.38687	-2.63952	0.738374	-9.06977	-1.62714	0.504532	4.65805	-1.52287		0.096087	-0.39192	-0.79648	6.34863	-10.5643	0.338295		0.0177	-1.27433	-1.37546	-0.39192	-12.484	-48.9187		1.45404	-1.98729	0.399525		-0.78636	2.03065	0.895158		0.759646	-0.39551	6.62303	-2.84676	0.943167		-1.03785	-1.06757	-0.13204
9	-1.7724	-1.86847	1.29977	-3.02346	0.501503	-0.17827		-0.14669		-0.38181	-3.78211	1.3984	-20.8254	-2.20306	0.281612	3.98591	-2.04062		0.58412	-0.89761	0.18206	3.31043	-7.70691	-1.17345		-1.22882	-1.18079	-2.00751	-1.18079	-16.6404	-63.6365		2.27597	-1.59037	6.18924		-0.49306	1.53749	1.04942		0.768208	-0.58496	8.48497	-3.61263	1.00264		-1.63822	-1.39143	-0.11843
11	-0.91531	-2.07324	2.18745	-5.00231	0.445544	-0.23169		-0.14207		-1.75975	-3.10213	2.19757	-30.9983	-2.82782	0.271438	2.78842	-2.66521		-0.11126	-0.32618	-0.46778	5.11402	-5.05599	4.99736		-2.39431	-1.39063	-0.66247	-0.73074	-20.7599	-74.8204		1.27449	-1.04931	1.97248		-1.16815	2.69076	1.56531		0.847261	-0.736	9.82832	-3.94499	1.31703		-1.96308	-0.68692	-0.07822
13	-0.52593	-1.88869	1.09999	-3.03053	0.473986	-0.29747		-0.1588		-2.22746	-1.76987	2.14446	-40.7783	-3.23494	-0.18809	2.40424	-3.25008		-0.27308	0.240219	-0.72568	4.18563	-2.48784	8.74927		-3.65572	-0.41468	0.56389	-1.84824	-25.0847	-88.735		0.935619	-2.57885	3.11567		0.391939	4.388	1.69935		1.07003	-0.75262	11.0387	-4.60971	1.35689		-2.10029	0.734443	-0.17099
15	0.659982	-1.44373	1.98007	-3.41133	0.808906	-0.34031		-0.23352		-0.8698	-0.96335	2.79446	-52.9289	-3.61688		1.8163	-3.79523		-0.80153	-0.77372	-1.26675	2.82228	0.113787	4.92005		-4.38115	-0.33883	0.002529	-1.86847	-29.612	-107.56		1.01401	-0.42479	3.51025		1.61589	4.6612	0.892629		0.836087	-0.92286	11.7172	-5.43339	1.2791		-2.29881	-1.47971	-0.29036
17	0.113787	-2.82659	2.29368	-3.22049	1.12459	-0.29841		-0.32959		-4.68193	-3.681	4.00603	-62.1209	-4.34376	0.07843	0.822668	-4.38615		-0.43491	-1.40328	-2.35892	2.92345	1.99018	8.67194		-7.92421	-0.36664	0.52596	-3.17291	-33.8248	-126.898		0.713086	-1.66621	3.71008		1.89155	4.71685	2.02812		0.570127	-0.82428	12.4222	-6.50274	1.51505		-2.76366	-2.1876	-0.68896
19	-0.2124	-2.91001	1.61589	-1.28807	1.43584	-0.26888		-0.26379		-5.5185	-3.66077	2.38978	-68.3618	-5.26754	0.054097	-0.86084	-5.09614		-1.07207	-1.34765	-1.84318	3.26743	4.30452	4.84274		-13.0144	-0.59926	0.488029	-3.24369	-37.9578	-144.128		0.065744	-4.70973	3.34332		2.87286	4.22105	2.59718		0.6529	-0.8025	13.1672	-7.55763	1.59413		-3.17266	-2.58826	-1.00779
21	-1.35018	-2.6016	1.63865	-1.70863	1.60942	-0.18109		-0.35369		-6.8225	-2.728	2.3215	-74.9389	-6.13653	0.017396	-3.31649	-5.71755		-1.26169	-1.79009	-2.28307	1.95984	5.33159	4.80409		-12.6911	-0.1416	0.303435	-4.17895	-42.2178	-160.894		0.273091	-5.43257	3.70502		4.66879	8.22106	3.2472		0.996541	-0.83833	13.859	-8.25125	1.98696		-4.12623	-3.20014	-1.48618
23	-1.12011	-2.81901	2.22033	-3.89706	1.71935	-0.17188		-0.33059		-11.1175	-2.58138	2.39231	-88.6706	-7.26164	-0.03167	-5.00369	-6.32365		-1.27939	-1.1555	-3.14005	1.98007	7.15576	0.976276		-17.2312	-0.0885	-0.16436	-4.1562	-46.6799	-166.752		-0.38687	-4.23708	3.40908		5.92865	8.82334	3.51784		0.985986	-0.91257	14.3247	-8.71366	2.22291		-5.19969	-3.85043	-1.77841
25	-0.66753	-4.33819	1.39081	-3.17428	1.85446	-0.15738		-0.3044		-12.436	-2.17437	2.59718	-132.467	-8.19871	-0.09752	-6.28142	-7.07326		-1.5752	-1.41086	-3.33217	2.24309	8.01356			-19.8917	0.359066	0.174474	-4.15873	-51.3894	-174.783		0.187117	-4.78808	3.19408		4.6865	9.3143	5.26328		1.44132	-0.9484	14.5511	-9.00267	2.22355		-6.23195	-4.30869	-2.09724
27	-0.799	-3.90849	2.10399	-3.63445	2.01474	-0.13759		-0.37285		-13.1937	-2.68503	2.80204	-151.623	-9.22904	-0.21105	-8.11442	-7.7587		-1.24652	-1.08471	-2.46004	0.450098	8.74489	26.5016		-23.0133	1.69176	0.637224	-4.32807	-56.8237	-181.44		0.085972	-5.1217	6.22719		5.83757	8.9271	5.42013		1.6889	-0.83061	14.7376	-9.20497	2.24381		-7.36944	-4.70936	-2.25649
29	-0.36411	-4.5227	0.561362	-1.1833	1.8893	-0.14783		-0.38936		-14.7594	-2.02015	0.177003	-157.284	-9.89368	-0.35461	-10.1811	-8.44107		-2.01004	-1.74711	-1.46395	2.4176	9.87109	3.70207		-25.1452	2.92092	1.22897	-8.44218	-61.6569	-190.174		0.020229	-4.80072	3.56084		6.02226	10.9518	4.7295		1.58229	-0.61682	14.4453	-9.73964	2.10719		-8.27536	-5.47485	-2.6551
31	-0.2832	-3.44339	0.844582	-2.83987	1.70021	-0.21899		-0.48828		-17.2488	-2.92518	2.34932	-162.367	-10.5627	-0.44432	-11.958	-9.14479		-1.87605	-1.62829	-2.50301	0.434926	10.9923	-14.3214		-27.8265	2.65535	1.94213	-8.98538	-66.8975	-190.693		0.139073	-5.57157	3.95797		5.28099	11.4429	5.70095		1.47294	-0.46543	14.4589	-10.3177	2.2647		-9.41832	-6.10593	-2.93403
33	0.477914	-3.54197	0.844582	-1.00002	1.59552	-0.22306		-0.57192		-18.3747	-2.92012	1.55267	-159.844	-11.4139	-0.57288	-13.2132	-9.93092		-1.93167	-2.2047	-3.28414	0.591706	11.8277	-5.13471		-30.5147	1.98765	1.96489	5.95648	-71.9372	-191.756		-0.06827	-2.41706	4.89899		6.88249	13.139	5.82745		1.05334	-0.11242	14.4858	-11.1991	2.42222		-10.7837	-6.98664	-3.38583
35	0.197232	-5.07116	0.978609	0.826922	1.79731	-0.2395		-0.57918		-20.881	-3.4358	0.045515	-160.263	-12.2843	-0.62112	-14.5749	-10.6773		-1.90386	-1.99993	-3.67089	0.991253	13.858	2.21781		-33.119	3.29779	1.56278	-3.00102	-76.5025	-195.506		-0.48548	-6.13261	5.36448		7.11022	12.2023	6.50044		1.0264	-0.01384	14.0739	-11.8783	2.30521		-12.2396	-7.84814	-3.89082
37	-0.09356	-5.82429	-0.0177	2.05575	1.96505	-0.26831		-0.64444		-21.9056	-4.3483	-1.60301	-153.072	-13.2331	-0.73028	-16.0358	-11.494		-1.88363	-1.9974	-2.72295	0.280677	15.362	1.0215		-38.1695	4.00856	0.877456	-4.83358	-81.229	-190.948		-1.29203	-7.52245	4.89899		7.39614	12.1441	6.14117		1.08459	-0.18408	13.5689	-12.3407	2.69803		-13.7862	-8.57523	-4.4091
39	0.528488	-5.53619	0.672626	-0.23931	2.03954	-0.26976		-0.57226		-24.0856	-4.86896	-3.25886	-148.822	-14.3789	-0.84739	-18.2912	-12.3197		-2.05302	-1.70666	-3.13499	1.03171	11.0227	3.50882		-35.1808	6.5561	0.864812	-6.26908	-85.7602	-184.186		-1.14792	-6.25897	4.14516		7.20384	16.4712	7.54037		1.18399	-0.0663	13.7288	-12.6731	2.69868		-15.5112	-9.1103	-4.71463
41	-0.24021	-4.99028	1.49703	-2.54712	1.91713	-0.26151		-0.68021		-25.7002	-5.91527	-5.62211	-147.646	-15.3958	-0.9548	-20.2193	-13.1302		-1.77745	-2.01004	-3.01871	-0.13654	12.5567	4.94392		-37.8974	4.12239	2.20516	-8.57103	-90.2545	-170.985		-0.53352	-5.05599	2.82481		8.41844	16.6307	9.11184		1.41245	-0.15973	13.7158	-12.7164	2.89541		-17.2829	-9.37655	-4.76751
43	0.247805	-5.22533	1.33518	-0.18835	1.67185	-0.27004		-0.69958		-27.7811	-7.48455	-7.42391	-158.145	-16.2987	-1.07016	-21.6109	-13.962		-2.05049	-2.12633	-2.10611	0.561362	10.0331	3.74731		-40.0741	5.11402	1.76004	-9.21529	-95.5513	-169.671		-0.49812	-3.91354	2.60223		7.07732	17.2284	9.93183		1.41852	-0.00354	13.6497	-12.9043	2.81762		-18.6619	-9.79642	-4.95336
45	1.53243	-5.07368	1.16827	-1.9377	1.55538	-0.35274		-0.66701		-29.7532	-9.57656	-9.65235	-173.198	-16.8211	-1.20231	-23.0941	-14.8762		-2.60413	-1.85077	-2.01257	-0.12137	7.33288	4.34025		-40.5427	5.90335	1.16574	-10.4456	-101.211	-166.396		0.197232	-4.95237	2.09135		7.81112	17.388	9.99763		1.36328	-0.21219	13.5835	-13.0199	2.50452		-19.985	-10.3123	-5.13921
47	2.46313	-4.53533	1.84097	-1.36034	1.56773	-0.34628		-0.74129		-30.9357	-10.1046	-10.6174	-168.741	-17.3184	-1.35565	-24.3997	-15.7385		-1.98982	-1.87858	-3.27908	0.252862	10.2862	2.40693		-42.3739	6.18924	2.33667	-12.2592	-107.033	-155.136		0.217461	-6.62287	2.85769		7.86173	17.7654	10.3317		1.17351	-0.17121	13.5306	-13.3089	2.30907		-21.2084	-10.8858	-5.32506
49	3.03979	-4.38621	0.960907	1.54411	1.91617	-0.40957		-0.70256		-33.0383	-10.635	-13.2745	-152.378	-18.0273	-1.46398	-26.0211	-16.6099		-2.0151	-1.61565	-2.26791	0.192175	6.39924	4.26295		-42.6761	5.25569	3.90738	-13.1154	-113.258	-151.296		0.611936	-6.08712	2.9715		8.14008	19.1306	11.0278		0.54168	-0.13023	13.757	-14.2626	2.38815		-22.3906	-11.4016	-5.65718
51	3.72273	-4.76281	1.06459	2.09518	2.0381	-0.43226		-0.77068		-34.5809	-12.6027	-15.936	-139.393	-18.8591	-1.50522	-27.1434	-17.4904		-2.59149	-1.3603	-3.01871	0.106201	6.02732	5.17174		-43.618	4.65867	4.37282	-14.4185	-119.364	-140.035		0.905273	-5.90769	2.88551		9.46868	20.1667	11.1543		0.463602	0.045156	14.236	-14.6239	2.46723		-23.7513	-12.0135	-6.13557
53	3.47737	-4.48984	1.44139	3.21826	2.12599	-0.50262		-0.68914		-35.6697	-13.1381	-18.7433	-128.691	-19.6657	-1.6427	-29.1874	-18.4168		-2.36144	-0.81418	-3.24369	-0.6827	4.9673	6.08062		-43.2126	4.33235	4.55243	-16.7262	-125.871	-131.084		1.09493	-6.87304	2.97656		6.70538	21.3118	13.4124		0.426727	0.009327	14.5023	-14.8984	2.64436		-25.0707	-12.3566	-6.30813
55	3.45208	-5.52102	1.53749	0.231986	2.20945	-0.55005		-0.72667		-38.1418	-14.1962	-20.5656	-114.085	-20.6989	-2.23394	-31.3379	-19.4988		-2.31847	0.217461	-2.66986	-0.82176	3.54314	4.98916		-43.5349	4.39812	5.40495	-18.2157	-131.622	-126.224		0.905273	-5.6853	3.05244		9.64837	22.675	12.8681		0.782518	-0.23772	14.8749	-14.9273	2.70383		-26.7004	-12.6996	-6.44079
57	2.84504	-4.46962	2.75146	-2.76669	2.12562	-0.63633	0	-0.78554		-39.4771	-16.9509	-21.9712	-134.538	-21.3663	-0.7718	-32.4209	-20.4312		-1.56003	-0.13401	-2.9176	-0.177	2.03318	8.00391		-44.1368	4.05915	4.33488	-19.4525	-138.052	-115.265		1.07218	-5.15203	2.19757		7.75545	21.7628	14.215		1.06236	-0.33116	15.0481	-14.8695	2.86135		-27.996	-12.9275	-6.44048
59	2.22792	-4.2017	1.85109	-0.51383	1.69684	-0.70407	-1.26264	-0.80469		-40.8223	-17.6225	-26.1946	-140.251	-21.8457	-1.80711	-33.0271	-21.4215		-1.89628	0.197232	-3.85288	-0.3717	1.3984	6.91225		-44.3861	4.01362	4.6182	-21.5523	-144.006	-100.351		1.33518	-3.9641	2.16216		8.66138	22.7687	17.0537		0.826912	-0.15577	14.9952	-15.014	2.6659		-29.2797	-12.9825	-6.50665
61	0.452627	-4.84874	0.667568	1.14113	1.51533	-0.73122	-1.85163	-0.88184		-42.4016	-19.4677	-27.1833	-129.792	-22.0631	-2.228	-33.837	-22.4333		-1.4235	-0.65994	-3.31447	-0.05057	0.556304	5.92599		-44.9099	3.5659	5.84516	-22.9755	-150.994	-92.8741		1.68923	-4.85127	2.29873		7.58591	25.1205	17.6894		0.749824	-0.2108	14.9689	-15.3175	2.50967		-30.0976	-13.2488	-7.15791
63	4.41582	-3.67341	1.58807	1.02765	1.78834	-0.75308	-2.23911	-0.78489		-44.3332	-21.0552	-29.7254	-115.803	-22.3736	-2.99672	-35.9575	-23.4419		-1.04931	-0.8344	-4.27247	0.513316	0.068272	5.4662		-43.5475	4.00603	5.14944	-23.4448	-157.43	-85.2353		1.3984	-3.6633	2.51624		8.75754	24.2867	18.2213		0.24532	-0.01621	15.0224	-15.9966	2.37305		-30.303	-13.6878	-7.59641
65	2.2785	-4.71479	1.23908	2.65638	2.20497	-0.73875	-2.31927	-0.7948		-46.0455	-22.2538	-32.5518	-133.317	-22.6739	-3.2393	-36.9058	-24.5574		-1.31731	-0.91531	-4.4317	1.05194	-0.14413	6.52551		-44.9905	2.85263	5.26328	-26.2072	-164.342	-83.0637		1.32253	-4.65918	3.55073		8.49183	22.9867	21.7223		0.206703	0.063176	15.1424	-16.4735	2.27565		-31.0385	-13.9541	-7.98172
67	3.29273	-4.71731	1.72969	1.34609	2.36548	-0.72796	-2.26304	-0.78941		-48.4497	-23.8434	-34.3944	-159.444	-23.3338	-3.52515	-37.7512	-25.7064		-0.59673	-0.60684	-4.60358	0.209875	0.113787	7.70528		-44.1821	2.98415	5.6377	-27.254	-171.218	-75.9042		1.28207	-4.45445	3.83908		7.32529	25.8048	18.1402		0.428953	0.468986	15.4619	-16.7481	2.39395		-31.8645	-14.2971	-8.38033
69	1.77016	-4.71984	2.49854	0.022734	2.71403	-0.73395	-2.27395	-0.79316		-49.3785	-25.8263	-36.3829	-150.386	-23.7762	-3.65563	-38.4189	-26.8524		-1.96706	-0.89761	-5.86726	1.36805	-0.27056	5.77135		-45.0081	2.9108	4.36017	-28.7747	-177.696	-64.4535		1.78786	-2.72547	3.56084		6.07033	26.7275	19.3864		0.70705	0.452359	15.9675	-16.9648	2.4142		-32.6346	-14.6786	-8.81883
71	0.541132	-3.68352	1.43381	-4.36815	2.80647	-0.71259	-2.22989	-0.83047		-50.5413	-27.1606	-41.4672	-142.211	-24.4746	-3.83821	-39.9411	-28.0319		-2.25527	-0.89761	-4.17389	0.472857	-1.85835	1.9432		-44.3937	2.1394	3.8922	-31.0215	-184.135	-55.6314		1.77775	-3.47878	3.5482		7.13299	27.7618	19.7842		0.99706	0.070899	16.4199	-16.7192	2.7482		-33.305	-14.6184	-8.85841
73	3.9858	-3.56219	1.91431	-2.07826	2.61317	-0.70801	-2.27738	-0.93798		-51.714	-29.1454	-44.167	-139.328	-24.7926	-4.06405	-41.4202	-29.2084		-3.37008	0.080915	-5.32642	0.768719	-0.06069	8.95828		-44.6027	1.65635	3.27502	-32.8694	-190.3	-50.1048		0.217461	-2.37156	2.7894		5.59976	27.1457	20.9191		1.25505	-0.09934	16.5	-16.907	2.72923		-33.9195	-14.731	-8.96448
75	1.46162	-3.5723	0.981138	-2.2711	2.45987	-0.72903	-2.35131	-0.79812		-53.0099	-30.7441	-46.0253	-133.519	-24.8336	-4.31109	-42.9087	-30.3451		-4.6238	-0.52341	-4.87149	-0.72315	0.0177	11.0712		-44.5448	2.55924	3.3332	-34.0466	-196.942	-47.8789		-0.0531	-3.20577	2.56935		5.46061	27.739	21.5753		1.30529	-0.26958	16.3008	-16.6469	2.45535		-34.1121	-14.8053	-8.85779
77	0.419754	-3.97421	0.748489	-3.64693	2.25771	-0.71387	-2.42725	-0.77733		-54.3106	-31.6921	-48.4471	-121.25	-24.9828	-4.56608	-43.3595	-31.4665		-2.38925	-0.44249	-3.6178	0.194703	-0.27561	9.40752		-44.4969	3.35849	3.64937	-35.5236	-203.703	-40.0348		0.531017	-2.3488	2.61741		4.2261	26.2433	22.1302		0.898822	-0.2094	16.1017	-16.7769	2.16186		-34.2489	-14.8411	-9.00374
79	-0.0531	-4.11828	0.93309	-0.94159	2.21398	-0.6228	-2.59475	-0.74124		-56.1923	-33.9432	-50.1713	-104.857	-25.1364	-4.83786	-44.1562	-32.7803		-1.23135	0.123902	-4.53533	0.273091	0.472857	7.47329		-44.4541	0.18206	3.13591	-37.3077	-210.86	-37.1456		1.08735	-1.38558	3.66708		6.16647	27.4956	22.49		0.167449	-0.03401	15.9158	-17.2682	2.02524		-34.403	-14.9537	-9.28268
81	-0.30596	-4.39632	-0.57397	-1.75911	2.07699	-0.62796	-2.64216	-0.77536		-58.0837	-34.5053	-52.7432	-93.7579	-25.472	-5.04696	-45.2314	-33.9933		-2.19206	-0.49559	-4.65413	0.326193	2.7287	2.06571		-44.5095	2.061	3.02209	-39.8122	-216.596	-33.2634		1.00896	-1.50946	4.24381		3.18902	28.0863	22.3709		0.370583	0.179779	16.1422	-17.4561	2.30041		-34.5891	-15.2584	-9.68128
83	0.118844	-3.76188	-0.53858	0.335144	2.20207	-0.58811	-2.55318	-0.70868		-59.5247	-36.1082	-53.9131	-87.9702	-25.8713	-5.28167	-45.6279	-35.2398		-2.71031	-2.40442	-4.78556	1.02666	3.4622	5.50075		-43.7591	2.54406	3.03221	-40.6661	-224.151	-33.3495		0.040458	-1.30973	4.81045		2.49095	29.1156	23.3617		0.424542	0.316765	16.2489	-17.5861	2.43832		-34.7926	-15.371	-10.04
85	-0.38181	-4.56314	0.902744	-2.84878	2.33751	-0.48117	-2.43365	-0.80992		-60.6311	-35.5462	-57.6134	-86.3221	-26.3935	-5.51551	-47.0134	-36.5688		-2.41959	-5.15456	-3.05663	0.619522	0.677683	8.30503		-43.5576	3.51784	1.66647	-43.2201	-229.654	-29.4659		-0.07333	-0.78131	4.62578		2.31644	31.905	23.9699		0.666146	0.338541	16.5019	-17.6295	2.59583		-35.2185	-15.2724	-9.89342
87	-0.65994	-4.97764	0.930561	-4.87548	2.14282	-0.43074	-2.29986	-0.72486		-62.0893	-39.3234	-59.2129	-81.144	-27.2162	-5.77054	-48.6102	-37.8336		-2.59149	0.053101	-4.20675	1.80809	3.19661	10.1621		-43.3184	-0.85969	0.971022	-45.0987	-236.025	-24.8717		0.571476	-4.61621	4.5246		1.89914	28.5401	24.3804		0.948952	0.28351	16.7016	-17.485	3.16514		-35.7204	-15.1163	-9.48089
89	0.31355	-3.83013	0.953321	-6.33033	1.94369	-0.34854	-2.24134	-0.74665		-64.8091	-41.8425	-61.3753	-74.7938	-27.5548	-6.01588	-50.4781	-39.1931		-2.04291	-0.87233	-5.11665	1.48186	8.70693	7.27997		-41.0969	0.192175	0.262977	-47.6995	-241.138	-24.1224		0.730787	-4.30785	4.04397		3.44702	32.8662	25.2472		0.818986	0.324488	17.1009	-17.326	2.65813		-35.8588	-14.9025	-9.12155
91	-0.2124	-3.46614	1.81821	-5.45945	1.54767	-0.28312	-2.27438	-0.85086		-65.1434	-44.3962	-63.4015	-71.4062	-27.7202	-6.33979	-50.9792	-40.5983		-1.59542	0.740902	-3.00355	1.80557	10.0153	5.34613		-42.0918	-0.93554	0.093558	-49.0689	-246.529	-20.7874		1.36047	-1.95189	3.92003		2.18745	29.7191	24.9862		0.89131	0.346264	17.7395	-17.3116	2.55855		-35.9415	-15.0151	-8.73561
93	-0.17447	-2.58138	0.84964	-4.60172	1.13241	-0.22566	-2.36642	-1.67265		-66.7392	-42.0767	-65.5707	-69.8022	-27.8603	-6.60985	-51.5196	-41.976		-1.33501	-2.37914	-1.03414	1.96742	9.04351	8.15036		-41.918	-0.37928	1.0039	-53.2539	-251.645	-16.8993		0.963436	-1.04679	3.13844		0.346422	32.1763	25.2726		0.550861	0.675267	18.0722	-17.485	2.34349		-35.7486	-14.8781	-8.82838
95	-0.49054	-1.96201	0.720672	-0.24751	1.2161	-0.10993	-2.18369	-1.14776		-67.2016	-42.1296	-67.6036	-64.0714	-28.0049	-6.87463	-52.3235	-43.3628		-0.63213	0.407111	-1.23641	3.45461	9.10425	8.1117		-42.5653	-0.32618	-0.55628	-56.2049	-258.499	-16.9856		0.303435	-0.50065	2.99174		0.609407	33.9746	25.7364		0.295548	0.831455	18.2454	-17.8607	2.2657		-35.7488	-14.9716	-8.77488
97	-0.1239	-1.3426	0.586649	-4.09548	1.4138	-0.01099	-1.95412	-1.01066		-68.5861	-43.7465	-69.6413	-58.3493	-28.5389	-7.20033	-53.3462	-44.8199		-0.74844	-0.45767	0.571476	3.42679	8.96	4.2827		-42.7693	0.614465	-0.21746	-59.0419	-267.832	-17.0718		0.637224	0.632166	3.94027		1.03677	31.0478	24.8873		0.359679	0.910836	18.6579	-17.9185	2.36439		-35.9275	-15.2186	-4.09389
99	-0.45514	-2.02774	2.2785	-2.69245	1.59226	0.062337	-1.93823	-0.96818		-71.0028	-43.9354	-71.9623	-54.2634	-28.9885	-7.49868	-54.4007	-46.2861		-0.78383	-1.13275	-0.59673	3.77838	8.76766	7.08666		-42.2555	-0.43491	-1.11505	-60.2288	-269.602	-17.158		0.409639	-2.00751	3.40149		0.366652	36.1436	24.0256		0.377145	0.68299	18.9375	-18.193	2.40425		-36.314	-15.1584	-3.34893
101	-0.6827	-2.58644	1.85614	-4.22697	1.33695	0.136541	-1.73711	-0.77606		-68.3499	-43.4745	-73.5848	-29.7427	-29.7534	-7.75642	-55.5916	-47.7614		-0.10114	-0.23768	-0.29584	3.96809	8.29191	5.15285		-41.5704	-0.59673	-2.98332	-61.9963	-272.381	-15.2566		-0.0354	1.28207	3.49761		-0.36664	37.0595	24.0865		0.684768	0.435942	19.0442	-18.0774	2.54216		-36.381	-15.2135	-4.86451
103	-0.57397	-2.62436	2.13181	-4.60495	0.840318	0.163067	-1.64383	-0.703		-74.3808	-42.3664	-75.6338	-6.41607	-30.4339	-8.00887	-56.6423	-49.2947		0.662511	-0.53099	0.128959	3.58867	7.53025	5.11419		-41.976	-1.05943	-3.49394	-61.6996	-276.57	-14.3489		-0.27814	-2.92012	2.84504		-0.37422	33.4724	24.5097		0.594262	0.304104	18.486	-17.8462	2.62124		-36.48	-15.0957	-6.16734
105	-1.6207	-2.14656	2.6857	-4.99616	0.354064	0.168396	-1.63397	-0.60243		-75.4555	-46.7932	-78.1042	-9.4299	-30.7931	-8.28252	-57.5901	-50.7883		1.057	-0.13907	0.407111	3.72273	6.52574	5.60193		-41.5755	-1.63082	-4.29269	-60.1709	-280.997	-11.4528		-0.26044	-5.91275	3.10303		-0.94312	37.3716	25.4804		0.940356	0.21067	17.8347	-17.5861	2.62188		-36.6989	-15.2339	-7.19093
107	-1.75975	-3.0996	2.39231	-0.13647	-0.13662	0.152529	-1.74009	-0.49877		-77.336	-47.0475	-80.2979	-2.68006	-31.1123	-8.53764	-58.5547	-52.3643		1.08229	0.048043	0.404582	4.91417	5.79203	6.93201		-41.6334	-1.90639	-4.68951	-61.0384	-285.742	-11.5391		-0.0354	-3.81244	2.5213		-0.80406	34.865	25.4196		1.16656	0.290051	16.9308	-17.5138	2.19113		-36.7594	-15.2633	-7.98846
109	-1.79009	-2.62436	1.11011	1.78604	-0.26161	0.155193	-2.07616	-0.41647		-78.9978	-47.8959	-82.0747	0.16218	-31.3323	-8.84486	-59.6109	-53.9372		0.647338	0.0354	0.38941	4.18563	4.61567	6.89335		-40.4319	-0.99875	-4.82599	-63.0446	-290.69	-8.64218		0.553775	-2.2224	1.92696		-2.13392	32.9245	25.6249		0.745689	0.158214	16.2796	-17.7739	2.34864		-36.398	-15.4336	-8.30728
111	-1.48671	-3.06169	1.50967	1.35489	-0.3318	0.141075	-2.49565	-0.31887		-79.1835	-48.2256	-82.7371	5.83651	-31.616	-9.1512	-60.7213	-55.5071		0.930561	0.209875	0.227575	4.37535	3.51025	4.95957		-41.2279	-1.98223	-5.24807	-66.4678	-296.225	-10.7173		1.44139	-6.28171	1.96742		-11.7212	34.1699	25.4474		0.614971	0.141586	16.0006	-18.0629	2.66303		-36.508	-15.527	-8.49313
113	-1.1909	-1.67885	2.18745	5.59236	-0.21396	0.13666	-1.99726	-0.20597		-80.7472	-48.4295	-84.6615	9.12054	-32.0226	-9.40811	-61.9533	-57.1349		0.38941	-0.70292	-0.75602	5.21522	1.64371	3.02614		-41.3992	-1.03667	-5.27082	-68.2418	-300.275	-11.7979		2.47324	-7.17627	2.17986		3.34837	34.6468	24.051		0.569388	0.067354	15.8281	-18.482	2.52641		-36.606	-15.678	-8.82525
115	-1.13528	-0.68775	2.44037	2.20833	-0.13016	0.075736	-1.41133	-0.15106		-82.7722	-48.6334	-85.4718	15.3718	-32.6408	-9.69063	-63.4264	-58.7352		0.111259	-0.04551	-0.67006	4.81045	0.209875	2.9875		-42.0263	-2.54346	-6.80734	-71.7137	-304.876	-11.8842		0.895158	-3.71133	2.01295		3.43943	34.4616	24.1346		0.770028	-0.14129	15.7486	-18.3953	2.48784		-36.8093	-15.8099	-9.11748
117	-1.08724	-1.78251	2.54912	-1.18786	-0.3765	0.077483	-0.94953	-0.12972		-84.3504	-48.7089	-86.7034	13.5717	-33.3967	-9.95021	-64.8564	-60.4913		-0.17194	-0.5765	-0.19217	5.18992	-1.78756	5.79111		-41.85	-4.36852	-6.85282	-73.2583	-309.401	-9.2084		1.56025	-3.95146	1.92696		-19.8841	35.3774	23.5543		0.821493	-0.34994	15.4564	-18.0773	2.84145		-37.3521	-15.8841	-9.21025
119	-1.50693	-1.57772	2.65029	-4.0114	-0.53844	0.049206	-0.79094	-0.03201		-86.3924	-49.6956	-89.1988		-33.8462	-10.2177	-66.1014	-62.2442		-0.64477	-1.01645	0.139073	5.5441	-3.71133	3.54175		-40.8651	-7.67911	-7.72712	-76.2188	-306.041	-6.08982		1.05194	-4.08543	1.9219		13.4504	34.8625	23.8026		1.03131	-0.53938	15.5631	-17.8028	2.76365		-37.9562	-15.7279	-9.06367
121	-0.67258	-2.15667	2.32908	-3.92363	-0.98611	-0.00468	-1.02511	-0.02894		-87.0771	-50.0354	-90.0188	-110.836	-34.4777	-10.5285	-67.1313	-63.8842		-0.58156	-1.46143	-1.98476	5.59976	-5.79902	3.39784		-41.0641	-0.73074	-8.47755	-78.7869	-317.838	-5.18134		1.5552	-5.37191	2.64523		25.2067	36.1081	23.1108		1.20912	-0.70962	15.5767	-17.6438	2.60743		-38.0212	-15.7446	-8.94368
123	-0.07839	-2.34628	2.84504	-0.92448	-1.45302	-0.03562	-1.47295	0.087152		-88.9079	-49.4666	-92.3806	-113.173	-34.6992	-10.8208	-67.9611	-65.6676		-0.43744	-1.22124	3.59626	5.22281	-7.49466	9.46596		-41.0893	-4.22444	-8.83127	-81.0985	-320.457	-4.27279		0.434926	-6.42576	4.09204		-10.1323	36.3618	23.1539		1.03272	-0.38062	15.1515	-17.6727	2.13745		-37.8107	-15.5692	-8.98326
125	-0.06574	-3.05916	2.37461	-1.44813	-1.495	-0.06128	-1.71929	0.010889		-89.6075	-51.2409	-93.3482	-113.003	-34.9398	-11.1607	-69.1443	-67.4113		0.424811	-0.98863	-1.09735	5.35942	-9.87214	9.42729		-41.0314	-4.45445	-10.9685	-83.1561	-323.941	-3.36416		1.18092	-7.54267	3.9605		0.465271	36.7246	23.0931		0.838956	-0.53166	14.8326	-17.8028	1.82435		-37.8666	-15.6434	-8.90316
127	0.283206	-3.12488	1.47427	0.35503	-1.58584	-0.08164	-1.46292	0.229109		-90.5453	-51.5857	-93.0624	-113.369	-35.3033	-11.4866	-70.4939	-69.2252		0.103673	-0.66247	-1.89375	5.33412	-12.2946	5.59783		-41.4319	-4.48731	-10.6603	-85.2385	-327.467	-7.98238		0.791478	-4.94984	3.81885		-4.21939	37.3082	23.3946		0.613168	-0.39467	14.6069	-18.034	2.00148		-37.8812	-15.9289	-9.12891
129	0.278148	-3.45097	1.83844	4.29109	-1.48863	-0.05699	-1.68072	-0.03991		-91.9443	-50.808	-94.4561	-114.334	-35.7157	-11.8248	-71.763	-71.0727		-0.58915	-0.93554	-1.62323	4.74215	-14.522	8.08621		-40.7568	-4.0652	-11.3196	-87.3455	-332.721	-11.4939		1.76763	-4.64907	3.38884		-3.59758	37.6736	22.381		0.750757	-0.33449	14.4609	-18.2074	2.06095		-38.0157	-16.0223	-9.36795
131	0.379295	-2.86704	0.230104	0.996627	-1.64754	-0.05796	-1.8761	0.338023		-93.2379	-51.2434	-95.436	-110.603	-36.5027	-12.1709	-73.1462	-72.9537		-0.56386	-1.11252	-1.49682	5.33918	-17.7941	2.67832		-41.9835	-4.97259	-12.537	-90.0313	-336.257	-10.5859		2.73628	-4.83358	2.7641		-2.21734	36.2755	22.0111		0.973482	-0.42792	14.674	-18.0484	2.33612		-38.4459	-16.0773	-9.64688
133	-0.79142	-3.97926	1.28966	0.419941	-1.574	-0.0757	-2.18747	0.936379		-93.857	-50.8156	-97.957	-112.769	-37.3829	-12.5603	-74.5312	-74.8195		-0.99875	-1.20101	-1.38305	5.09884	-19.9119	6.42942		-43.4015	-4.13092	-12.4006	-92.7415	-339.013	-3.04621		1.01654	-4.59347	3.4192		-0.45767	36.5292	21.7223		1.01774	-0.63657	14.7807	-17.9039	2.55246		-38.8202	-16.0171	-9.77954
135	-1.16562	-3.14005	1.49956	-0.55997	-1.75658	-0.14112	-2.13453	0.946094		-95.1679	-51.6888	-98.6635	-111.415	-37.9566	-12.9621	-75.8657	-76.6455		-1.35271	-2.37661	-1.01139	5.23799	-17.5745	6.39076		-43.1975	-5.77375	-14.32	-94.6416	-342.675	-5.78567		1.68417	-8.98286	2.30885		2.06353	37.1103	20.1718		1.19107	-0.73	14.7943	-17.3692	2.59232		-39.1386	-15.8994	-9.72604
137	-1.66621	-3.47372	2.27091	-0.77304	-2.38774	-0.2145	-2.05103	0.48524		-96.8269	-51.9153	-100.072	-110.072	-38.9937	-13.3851	-77.2095	-78.5906		-0.62707	-2.4752	0.022757	4.13251	-8.62156	6.3521		-41.646	-5.44015	-14.7518	-97.2604	-345.559	-5.872		-1.31479	-4.86643	2.75652		2.12423	37.9121	22.7916		1.0395	-0.63142	14.5287	-17.0946	2.37727		-38.9619	-15.7624	-9.59275
139	-1.71425	-2.50807	2.33161	-1.38932	-2.68282	-0.26493	-2.10793	0.345043		-98.3804	-51.7517	-100.788	-167.461	-39.295	-13.7675	-78.5403	-80.6547		-0.81418	-2.38167	0.639752	4.35005	1.01148	4.41842		-42.0893	-4.71479	-15.1937	-98.3754	-349.189	-2.97358		-1.11505	-5.87736	3.00944		1.25172	38.4932	22.4748		0.811967	-0.43683	14.2497	-17.0224	2.06417		-38.9343	-15.6254	-9.40628
141	-2.46256	-3.23864	0.983666	0.906295	-2.89349	-0.288	-1.78424	0.244571		-99.8285	-51.9807	-102.484	-231.024	-39.423	-14.1181	-79.813	-82.5936		-0.73579	-1.99993	-2.66733	3.73285	8.57028	2.48509		-41.0037	-5.18741	-16.6025	-103.403	-350.911	-6.04466		1.06206	-3.33722	2.32655		-0.82429	39.186	21.4005		0.512146	-0.28064	14.157	-17.2102	2.2609		-38.9827	-15.5652	-9.44586
143	-2.18448	-2.79626	0.053101	-0.06159	-2.66444	-0.31903	-1.61723	0.269324		-100.149	-52.6023	-103.763	-231.672	-39.9997	-14.5252	-81.2073	-84.6516		-1.29962	-1.72183	-0.99369	3.22191	13.2124	5.28858		-42.9985	-5.36433	-17.8875	-104.011	-354.784	-4.14128		1.41358	-5.12423	1.72717		-2.41706	39.8763	20.4099		0.831978	0.067565	14.1972	-17.4559	2.17004		-39.151	-15.7162	-9.71149
145	-2.05808	-2.74823	0.242747	0.192443	-2.43982	-0.34036	-1.77786	0.223872		-101.955	-53.3571	-104.071	-232.33	-40.5067	-14.927	-82.753	-86.621		-1.96201	-2.13897	0.801593	2.54912	15.6077	4.30246		-43.2831	-2.84934	-19.1799	-105.892	-358.349	-8.64866		0.801593	-6.18315	1.34024		-0.60179	39.3561	20.4352		1.39518	0.108542	14.3305	-17.2969	1.59548		-39.5124	-15.9249	-9.84415
147	-4.79314	-2.5738	-0.41468	-1.06184	-2.38249	-0.35198	-1.90794	0.181501		-102.972	-54.8893	-104.242	-233.518	-41.3439	-15.2838	-84.3005	-88.795		-1.90892	-0.69028	-0.11126	2.52636	16.0027	4.26381		-44.2073	-4.05257	-20.7599	-106.826	-361.019	-9.95042		1.14045	-5.77628	4.73203		-0.13654	39.4956	19.8906		1.01192	-0.0233	14.9026	-16.9934	2.34127		-39.9644	-16.1335	-9.87044
149	-0.53352	-2.53082	-0.19217	-2.32921	-2.41842	-0.3848	-2.04817	0.093353		-103.771	-52.6601	-105.534	-231.742	-42.1707	-15.7192	-85.8424	-90.5418		-2.58644	-2.89232	0.042986	2.34173	14.6708	3.27779		-44.5976	-4.54544	-23.9847	-110.558	-363.619	-7.93722		0.895158	-4.46962	2.44037		-1.69402	40.186	19.3358		0.599881	-0.27034	15.6342	-16.7189	2.40074		-40.6095	-13.9852	-9.84353
151	-2.19206	-3.14005	2.4176	-4.7793	-2.78449	-0.34612	-2.13342	0.057144		-105.374	-56.0817	-107.389	-234.504	-42.9723	-16.1582	-87.3712	-92.9029		-1.91397	-0.86474	-0.354	2.8071	12.6124	3.23914		-44.8117	-5.14192	-23.4044	-112.512	-366.417	-6.47629		-0.1947	-4.79314	2.71605		-3.07938	40.4347	19.1433		1.07354	-0.22937	15.9936	-16.5888	2.06803		-41.1841	-12.7745	-9.76343
153	2.29368	-3.75177	-0.02023	-0.80891	-3.42148	-0.39926	-2.41607			-106.302	-62.7505	-108.408	-225.7	-43.4231	-16.5786	-88.7373	-95.0514		-2.42464	-1.4058	-0.0885	2.7034	10.2305	7.93813		-44.6732	-5.94307	-24.1992	-115.459	-368.946	-4.57299		0.027815	-9.24813	0.123902		1.63359	40.9042	18.1959		0.900113	0.330058	15.6083	-16.5454	1.67649		-41.1903	-15.9402	-9.85916
155	-1.61818	-3.58242	0.149188	-0.94607	-3.57433	-0.4427	-2.87982	-0.0671		-108.26	-50.2644	-108.873	-201.151	-43.9078	-17.0069	-89.8061	-97.4234		-1.94937	-0.57145	-0.51076	2.70846	7.60363	0.320273		-44.8142	-6.25391	-26.3661	-117.738	-371.989	-2.66935		0.123902	-6.88062	3.4192		-6.26149	41.7038	18.3555		0.855756	0.044607	15.3692	-16.4009	1.40261		-41.1992	-15.8928	-7.95436
157	-1.40075	-3.67847	0.457684	0.07359	-3.65759	-0.43671	-2.56408	-0.10628		-108.523	-55.3169	-109.482	-192.342	-44.2342	-17.3947	-91.3554	-99.5453		-1.29962	-1.27686	-0.94312	1.19862	4.93188	4.07055		-44.6002	-6.27413	-29.2261	-120.179	-373.476	-2.0923		0.811708	-6.58496	2.37208		-6.69868	42.6101	18.7836		0.925823	0.136789	15.2632	-16.5743	1.48169		-41.123	-15.8326	-8.61892
159	-0.96335	-3.90596	1.18092	-1.26007	-3.38996	-0.42985	-2.04684	-0.16681		-110.273	-51.6662	-109.817	-189.968	-44.6982	-17.8169	-92.9514	-101.652		-1.2895	-1.18837	-0.98358	1.68923	3.06003	0.66392		-44.4818	-5.60442	-28.5553	-121.396	-374.071	-7.93722		0.341365	-6.50915	2.32655		-4.59094	42.8588	18.6417		1.44713	0.088159	15.3964	-16.8344	1.6196		-41.6207	-16.1181	-8.88456
161	0.270563	-3.74419	0.212404	0.318143	-3.33402	-0.43535	-2.25612	-0.30976		-111.121	-52.0462	-110.433	-189.358	-45.4776	-18.2603	-94.6241	-104.061		-1.56003	6.23225	-1.30467	1.20873	2.32908	3.28273		-45.1843	-6.03152	-29.6674	-124.576	-374.323	-6.47629		-0.23263	-6.10481	2.36196		-6.355	42.6659	17.9351		1.51174	-0.10128	15.5031	-16.8055	1.94924		-41.8135	-16.3651	-8.79116
163	1.61083	-3.58494	-1.07207	0.128037	-3.23811	-0.41791	-2.69536	-0.49849		-112.317	-52.557	-110.635	-186.941	-46.2318	-18.6675	-96.4032	-106.091		-2.11117	-2.49543	-1.50188	2.05341	1.71705	0.376179		-45.7156	-6.36258	-31.3341	-126.258	-375.592	-4.57299		-0.0354	-7.11815	2.94115		-7.88631	43.0239	17.0283		1.25144	-0.42514	15.2109	-17.0223	1.69932		-42.5217	-16.5546	-8.67117
165	1.33265	-3.81749	2.62753	-3.00014	-3.33909	-0.40401	-3.03891	-0.73299		-113.748	-50.73	-111.957	-192.911	-46.8719	-19.1135	-98.2292	-107.778		-1.94431	-0.53352	-3.19566	1.92443	1.46162	2.73178		-46.2519	-6.40554	-32.877	-130.316	-377.218	-2.66935		0.230104	-6.38785	3.32308		-7.02213	42.2801	16.6713		0.856606	-0.71059	14.9719	-16.4587	1.58231		-43.2325	-16.4752	-8.59108
167	3.57349	-4.05257	1.08482	-4.38633	-3.7406	-0.43779	-3.05886	-0.84226		-114.962	-53.4527	-113.003	-191.687	-47.5165	-19.5454	-99.855	-107.778		-2.1769	-0.72062	-2.87715	1.90167	1.99524	4.82472		-46.8864	-7.14595	-32.3879	-135.091	-378.924	-2.0923		-3.32964	-7.18638	3.87703		-7.46686	44.141	15.9343		0.385821	-0.76562	14.7727	-16.1552	1.40647		-43.4336	-16.415	-10.2928
169	2.93356	-4.42159	1.64877	-3.44637	-4.27979	-0.47069	-3.00755	-1.04617		-116.978	-51.1125	-113.078	-193.46	-47.9879	-19.95	-101.468	-115.192		-0.04299	-0.91278	-4.05509	0.907802	2.44542	1.94406		-47.7977	-9.08139	-36.1309	-138.641	-380.91	-4.57299		2.81975	-6.34742	3.86944		-8.02528	42.4425	15.557		0.556657	-0.91666	14.3209	-15.794	1.07376		-43.4324	-16.0903	-10.1994
171	3.2042	-4.0096	2.49095		-4.58652	-0.49831	-2.21746	-1.22258		-118.658	-49.8114	-114.271	-194.66	-48.3749	-20.3846	-103.06	-115.192		-2.03279	-0.8167	-4.57072	-0.92542	3.49002	2.85266		-48.1753	-8.14656	-37.4337	-140.695	-383.171	7.5906		-2.47268	-6.49146	4.49424		-9.63972	42.5314	15.2633		1.36911	-0.83728	13.7893	-15.924	1.0548		-43.4778	-16.4675	-9.52982
173	2.2001	-4.25225	1.91937		-4.6312	-0.40587	-1.29913	-1.40811		-119.669	-50.9817	-114.354	-203.544	-48.7811	-20.8051	-104.654	-118.809		-1.71425	1.09493	-5.90769	-2.24263	5.28605	0.919612		-48.1098	-8.6064	-37.7941	-143.325	-383.806	4.51651		0.257919	-5.98098	4.09457		-10.9862	39.5261	14.5872		0.421517	-0.98832	13.2711	-16.0974	0.957398		-43.7603	-16.6398	-9.10251
175	4.06168	-3.97421	1.48691		-4.57667	-0.37877	-0.63518	-1.66385		-120.346	-51.1151	-114.716	-231.299	-49.3102	-21.1673	-106.332	-118.809		-2.12886	-5.07621	-6.71384	-1.96706	6.15888	1.82813		-48.5906	-8.08086	-38.7112	-145.146	-391.445	-2.75895		1.49703	-5.90769	3.31296		-11.259	41.3916	14.1796		0.276628	-0.81293	13.6437	-15.6928	0.977651		-44.0015	-16.7599	-9.79957
177	5.5694	-9.68772	1.04689		-4.36371	-0.56708	-0.41282	-1.76993		-121.259	-51.6385	-115.504	-287.292	-50.0065	-21.5905	-108.588	-123.478		-2.64205	-1.64851	-6.59001	-1.0392	8.06417	1.78948		-49.532	-7.85851	-40.4571	-147.409	-406.699	-12.5704		2.11411	-4.96248	2.79951		-10.8523	44.1943	13.2023		0.40237	-1.2712	13.7618	-15.6783	1.37048		-44.3773	-17.6503	-9.86575
179	-2.46762	-1.67885	3.56084					-2.15387		-122.409	-48.6561	-116.573	-288.463	-50.8109	-22.0172	-111.092	-125.7		-0.80659	-0.29584	-5.80408	0.265505	9.52436	4.59279		-49.9372	-7.54014	-41.9407	-149.832	-421.861	-11.6625		3.22191	-4.01718	7.25191		-10.3976	45.2099	12.5896					-15.0762			-44.6387	-17.1484	-9.89203
[truncated: 2 more columns]

## Sheet: Figure 3 F
DMSO	Noco 5min.	Noco 2h.	Colchi. 2h.
117.147	47.6181	8.98903	43.4689
51.2101	7.52595	-42.7407	16.6566
113.452	35.8734	-15.2948	9.47354
215.961	138.129		-11.0453
48.1369	387.395		23.7961
20.1501	2.97695
102.43
114.289

## Sheet: Figure 3 H
Microtubule nucleation site clusters	DMSO	Noco 5 min	Noco 2h		Intermediate structures	DMSO	Noco 5 min	Noco 2h		Small structures	DMSO	Noco 5 min	Noco 2h
	7	1	3			168	64	550			283	72	440									72	150	318	135	112	77	321	134			440	135	466	434	237	593	811	551	442
	15	6	3			153	157	76			169	150	135
	18	5	4			100	435	695			111	318	466
	12	3	6			195	80	655			242	135	434
	25	5	6			231	90	250			200	112	237
	7	2	5			114	95	595			177	77	593
	6	1	10			309	252	632			414	321	811
	9	2	2			115	92	949			84	134	551
	6		7			113		290			128		442
	3					274					141
