# Supplementary material for: Microtubule-mediated GLUT4 trafficking is disrupted in insulin-resistant skeletal muscle
Source: eLife journal article supplement (doi:10.7554/elife.83338), 2023-04-19
Supplement: fig3-figsupp1-data1 [file Figure 3 - figure supplement 1 - source data 1.xlsx]

## Sheet: Figure 3 - fig. supp. 1 A
Akt2	SOL	Basal												Insulin
	DMSO	1.05629	1.27023	1.17218				1.07636	1.10188	1.03813	1.86364			0.956517	1.07757	0.993941				0.92592	1.11141	0.66686	0.72249
	Noco 15 min.	1.12772	0.801336	1.28452				1.14544	0.94399	0.78138				0.761609	0.920923	0.914941				1.03193	0.67635	1.28957
	Noco 40 min.	0.952528	1.07582	0.907194	1.12765			1.18552	1.1951	0.73565				0.877514	0.977774	0.822071	0.795959			0.76022	0.84389	1.21165
	Noco 2h.	1.09823	1.05473	1.4371	0.746858			1.04093	1.48185	0.69158	0.63821			1.09954	0.485874	0.873856	0.605241			1.00004	1.35656	0.70779	0.77565
Akt 473	SOL
	DMSO	0.083048	0.024078	0.09392				0.2098	0.0011	0.09356	0.12403			1.67545	2.11948	0.846655				1.49408	2.11717	1.31022	1.90404
	Noco 15 min.	0.059517	0.086254	0.105813				0.14163	0.18359	0.0132				2.08642	2.14698	3.86781				2.35807	1.78262	1.62494
	Noco 40 min.	0.051792	0.128677	0.107712	0.116514			0.12436	0.13986	0.11855				1.69341	2.71572	1.39112	2.53869			1.5998	2.24075	2.43657
	Noco 2h.	0.113803	0.115508	0.022144	0.148474			0.12945	0.16677	0.10374	0.0681			1.85977	0.713986	1.89093	2.45183			1.86052	1.69834	2.07988	1.90383
Akt 308	SOL
	DMSO	0.086308	0.041344	0.007271				0.0154	0.00942	0.01658	0.01577			1.12054	2.65602	2.88182				1.43274	2.61159	1.52693	2.03643
	Noco 15 min.	0.014731	0.036346	0.067915				0.01504	0.03674	0.12105				1.52464	2.28026	1.36208				1.79903	2.33153	1.87907
	Noco 40 min.	0.004497	0.093475	0.001272	0.065035			0.01546	0.0294	0.01726				1.73106	1.91017	2.40193	3.1886			1.5646	1.27666	2.81837
	Noco 2h.	0.062321	0.071484	0.074377	0.046827			0.01139	0.03897	0.05714	0.00567			2.44193	0.686732	2.44147	1.07741			2.15705	2.24937	2.21128	1.97368
TBC1D4	SOL
	DMSO	0.918747	1.14875	0.044512				1.0651	0.72211	0.65943	0.97718			0.556497	1.17535	0.124716				1.35618	1.20154	0.81583	1.43914
	Noco 15 min.	1.13404	0.899837	0.58604				0.91118	0.82923	0.94441				0.958385	0.980225	2.28365				1.45659	1.29824	1.10149
	Noco 40 min.	0.842393	1.32953	1.68121	0.291838			0.84885	1.11659	1.02706				1.16002	1.32975	2.14001	1.319			0.92545	0.95735	0.92621
	Noco 2h.	1.05454	0.173899	1.41508	0.611687			0.71605	1.33439	1.11411	0.63363			1.17121	0.018852	0.872745	1.54695			0.66948	1.13044	0.87269	0.95005
TBC1D4 642	SOL
	DMSO	0.527332	0.159681	0.548736				0.19507	0.18894	0.31206	0.20226			1.18641	2.65589	1.85336				1.50843	2.09545	1.68402	2.44361
	Noco 15 min.	0.452317	0.43562	0.290315				0.34965	0.24028	0.35768				1.61314	1.69442	2.03071				1.80435	2.23997	1.5298
	Noco 40 min.	0.306961	0.401503	0.465845	0.42002			0.28542	0.17557	0.22048				1.64727	1.62785	1.56568	2.00922			1.39748	1.26591	1.16417
	Noco 2h.	0.624812	0.536099	0.379571	0.141527			0.2172	0.50818	0.74359	0.25207			0.696144	0.834541	1.46579	1.72261			1.47775	2.30662	1.73191	1.10206
TBC1D 588	SOL
	DMSO	0.646833	0.31898	0.70622				0.6282	0.45413	0.60495	0.44649			1.03989	1.54159	1.61482				1.27394	1.54388	1.28672	1.61942
	Noco 15 min.	0.44811	0.489052	1.00218				0.64659	0.58909	0.60471				1.39598	1.5647	1.61869				1.52271	1.48369	1.38806
	Noco 40 min.	0.537569	0.779094	0.583727	0.671585			0.62319	0.58609	0.37285				1.53938	1.1241	1.25758	1.31904			1.36304	0.93442	1.28164
	Noco 2h.	1.09215	0.744863	0.708843	0.600318			0.64815	0.627	1.0969	0.6398			1.38578	0.681677	1.1782	1.43775			1.22339	1.80043	1.41623	1.29429

## Sheet: Figure 3 - fig. supp. 1 B
	Basal													Insulin
Akt2	EDL
	DMSO	1.35238	1.6804	0.591033				1.26767	1.23576	1.91823				0.797405	1.00745	0.799261				0.87695	0.68735	0.62101
	Noco 15 min.	1.12283	1.20778	1.22532				1.70674	1.35996					0.780086	0.31584	0.923596				0.64631	0.8014
	Noco 40 min.	0.72211	1.26641	1.1479	1.5229			1.06496	0.68952	0.0336				0.462493	0.801019	0.734128	0.276297			0.10803	0.47993	0.73946
	Noco 2h.	1.56344	1.52862	1.36749	1.27926			1.28928	1.98832	1.49087				0.987795	0.675969	0.939254	0.919203			0.95559	0.7677	1.27136
Akt 473	EDL
	DMSO	0.064873	0.018153	0.037258				0.02403	0.02696	0.2582				1.56459	1.67117	2.26897				2.05639	2.02015	1.92847
	Noco 15 min.	0.028349	0.020697	0.127606				0.0544	0.16196					2.43525	2.3042	2.2069				2.18216	1.94436
	Noco 40 min.	0.061004	0.025318	0.11336	0.000975			0.0489	0.23767	0.1316				1.18077	2.10322	2.06036	2.11183			2.12422	1.96459	1.77096
	Noco 2h.	0.193619	0.097354	0.064112	0.042335			0.01811	0.25205	0.30967				2.45732	1.33536	1.56018	2.66662			1.47655	1.30627	1.84052
Akt 308	EDL
	DMSO	0.018587	0.005489	0.016416				0.00332	0.07324	0.0325				1.18266	2.57952	2.16737				2.49093	2.86888	2.24121
	Noco 15 min.	0.004951	0.012185	0.095619				0.03007	0.0025					1.86083	2.60589	1.99734				1.04817	2.93014
	Noco 40 min.	0.04326	0.002274	0.086535	0.00063			0.05953	0.03954	0.00224				1.40947	2.2012	1.82883	2.37501			0.53687	1.62459	2.17177
	Noco 2h.	0.092342	0.037958	0.023122	0.030894			0.16889	0.10974	0.05724				2.18482	1.82587	1.71746	2.73348			2.2493	1.98739	1.87786
TBC1D4	EDL
	DMSO	0.188407	2.52128	0.200369				0.53566	0.57278	1.02951				0.107569	1.5792	1.32051				1.38187	0.82629	1.14445
	Noco 15 min.	0.428257	1.35904	2.1644				1.3896	1.49942					1.10275	1.17424	1.20007				1.20603	1.01343
	Noco 40 min.	0.426622	0.770548	1.28994	1.06708			0.9102	1.10343	0.98177				0.484412	1.40151	0.808904	0.341031			0.47084	1.05467	0.87005
	Noco 2h.	1.86694	1.12399	0.535486	2.53735			1.05061	1.61198	0.69874				0.761282	0.88153	0.302748	0.795971			1.14327	0.83869	0.6667
TBC1D4 642	EDL
	DMSO	0.633597	0.06943	0.118917				0.65832	0.21407	0.19022				1.3615	1.1573	2.20832				2.46591	1.19427	1.61463
	Noco 15 min.	0.379185	0.228522	0.481704				0.42382	0.29035					2.16831	2.99276	1.16816				2.23227	1.50141
	Noco 40 min.	0.343109	0.491689	0.555141	0.394151			0.30822	0.10122	0.16718				0.453218	2.03468	0.88914	1.51614			1.2755	1.70102	2.48626
	Noco 2h.	0.420468	0.292437	0.585352	0.406557			0.17724	0.40983	0.20069				1.79259	1.33984	1.83461	1.99471			1.2586	1.19413	1.93484
TBC1D 588	EDL
	DMSO	0.361118	0.361586	0.147677				1.0168	0.42235	0.36545				1.08885	1.63942	1.2774				2.15695	0.9113	1.39106
	Noco 15 min.	0.367432	0.266361	0.795411				0.81936	0.21555					1.51215	2.00658	1.62156				1.76372	1.25625
	Noco 40 min.	0.455342	0.109639	0.55866	0.472428			0.52528	0.45979	0.36762				0.906963	1.56175	1.30434	1.62783			1.18352	1.66807	1.90163
	Noco 2h.	1.06976	0.514234	0.553928	0.814338			0.46603	0.65422	0.49974				1.96445	1.77897	1.77643	1.72063			1.26291	0.90301	1.78941

## Sheet: Figure 3 - fig. supp. 1 F
Time	Empty chip		Chip with fibers
1				1.00858
2	1.00199		1.00207
3	1.0067		1.00676	1.00204
4	1.01469		1.00022
5	1.00714		1.01189
6			0.98021
7			1.01759	0.999778
8			1.00556	1.0218
9			0.984553
10			0.994962	0.986789
11			0.997199	0.994695
12	1.00418		1.00001	0.982271
13	0.98219		0.980831	0.998648
14	1.00353			0.996389
15	1.00334			0.981142
16	1.00587			0.974365
17	0.999414		0.999786
18	1.00249		1.02203	0.998084
19	1.00339		0.986069	0.996954
20	1.00075			0.98453
21	0.997019		0.951675	0.983966
22	0.999554		0.966117	0.980013
23	0.998547		0.982511	0.983966
24	0.995359		0.981339	1.01898
25	0.994897		1.01179	0.970977
26	0.995797		1.01139
27	0.994245		0.987577
28	0.99024		0.983628	0.988483
29	0.99332		0.98286	0.982271
30	0.992585		0.982095	0.992436
31	0.991033		0.982487	0.961942
32	0.990298		0.981326	0.978883
33	0.989835		0.980153	0.975495
34	0.989646		0.972737	0.972671
35	0.987003		1.02424	0.972671
36	0.991718			0.970412
37	0.990711		0.950874	0.971542
38	0.994063		0.968824	0.975495
39	0.986244		0.975066	0.989613
40	0.990958		0.971942	0.922976
41	0.981232		0.977404	0.966459
42	0.985674		0.977015	0.969283
43	0.984939		0.97233	0.964201
44	0.985839		0.970376	0.967024
45	0.997093		0.974276	0.963071
46			0.968032	0.972671
47	1.00407		0.965688	0.981142
48	0.982899		0.967246
49	0.968268		0.966469
50	0.94192		0.967635
51	0.979332		0.963339	0.959683
52	0.976418		0.965337	0.963636
53	0.984402		0.960293	0.955165
54	0.984212		0.958266	0.954036
55	0.987565		0.96254	0.952341
56	0.985467		0.962953	0.956294
57	0.98664			0.954036
58	0.985087		0.94811	0.947824
59	0.986805		0.959034	0.953471
60	0.986343		0.961041	0.950083
61	0.986425		0.958945	0.948388
62	0.988143		0.956246	0.945565
63	0.985773		0.959004	0.947259
64	0.987218		0.94927	0.942741
65	0.985938		0.95044	0.947824
66	0.986293		0.950836	0.944435
67	0.98692		0.949664	0.947824
68	0.989183		0.950439	0.944435
69	0.985723		0.950045	0.940482
70	0.986623		0.948489	0.941612
71	0.985343		0.942664	0.940482
72	0.988151		0.941869	0.943306
73	0.987961		0.943827	0.937094
74	0.988861		0.941864	0.938788
75	0.988398		0.940289	0.938788
76	0.987936		0.937164	0.937659
77	0.986929		0.935218	0.937659
78	0.988919		0.922324	0.934271
79	0.987639		0.927402	0.934271
80	0.987176		0.934817	0.932576
81	0.989166		0.936374	0.932012
82	0.988976		0.935192	0.932012
83	0.989604		0.93165	0.933141
84	0.988869		0.955485	0.930318
85	0.988407		0.950817	0.927494
86	0.990396			0.926929
87	0.987209
88	0.985112		0.934417
89	0.987102		0.903195	0.921847
90	0.988547		0.923098	0.920717
91	0.987267		0.926232	0.930318
92	0.990619		0.923502	0.932012
93	0.986615		0.923871	0.913376
94	0.975526		0.92347
95			0.926993	0.907164
96			0.92192	0.916764
97	1.00438		0.922306	0.925235
98			0.923089	0.918458
99	0.977301		0.923088	0.925235
100			0.917621	0.918458
101			0.919964	0.917894
102			0.914115	0.919588
103	0.98962		0.917231	0.924106
104	0.99161		0.918398	0.923541
105	0.990058		0.915275	0.921847
106	0.988505		0.914104	0.923541
107	0.98886		0.913712	0.920717
108	0.987308		0.91215	0.917329
109	0.989298		0.911758	0.920153
110	0.986928		0.911764
111	0.989736		0.912924
112	0.986276		0.911367	0.920153
113			0.908632	0.913376
114	1.00116		0.909801	0.912811
115	0.987614		0.917995	0.912247
116			0.899265	0.939918
117	0.982329		0.905503	0.932576
118	0.988134		0.901976	0.909423
119	0.987944		0.898866	0.911117
120	0.986392		0.90355	0.911682
121	0.990834		0.898871	0.906035
122	0.987919			0.911682
123	0.994814			0.900388
124	0.990809		0.894571	0.893611
125	0.991709		0.901207	0.904905
126	0.994516		0.901988	0.912811
127	0.988877		0.898084	0.917894
128	0.990322		0.901595	0.915635
129	0.990132			0.896435
130	0.992122			0.900952
131	0.993294		0.891047	0.903211
132	0.992014		0.895345	0.887964
133	0.991552		0.892621	0.884575
134	0.99109		0.892989	0.898693
135	0.992262		0.893018	0.898129
136	0.989075		0.890274	0.896999
137	0.990792		0.888319	0.893046
138	0.991965		0.891437	0.892482
139	0.99232		0.891434	0.893611
140	0.993492		0.892224	0.895305
141	0.993575		0.892598
142	0.993385		0.890267	0.885705
143	0.991288		0.885975	0.909423
144	0.994095		0.888708	0.88627
145	0.992815		0.894163	0.88627
146	0.992625		0.896507	0.886834
147	0.993798			0.883446
148	0.995515			0.890223
149	0.995325		0.921868	0.885705
150	0.994046		0.898088	0.890787
151	0.995763			0.883446
152	0.996935		0.877002	0.895305
153	0.994021		0.886359	0.884575
154	1.0031		0.872696	0.878364
155			0.878155	0.889093
156	0.991544		0.875031	0.886834
157	0.994351		0.875802	0.889658
158	0.996068		0.867225	0.893611
159	0.995606		0.89298	0.877234
160	0.994054		0.880494	0.871022
161	0.994409		0.876201	0.914505
162	0.993674		0.874638	0.879493
163	0.996754		0.873857
164	1.00011		0.875418	0.87554
165	1.01708		0.875415	0.881187
166	1.00027		0.874245	0.890787
167	0.991907		0.871512
168			0.872293	0.904905
169	1.01469		0.871511	0.872152
170	0.999784		0.867214	0.877234
171	1.00096		0.86995	0.873846
172	0.997224		0.868392	0.876105
173	0.993765		0.86757	0.873846
174	0.999024		0.866017	0.876669
175	0.998289		0.863699	0.878928
176	0.995647		0.860187	0.869328
177			0.86604	0.871128
178			0.860969	0.887505
179			0.857452	0.861528
180			0.858225	0.887505
181			0.856669	0.864352
182			0.853551	0.864916
183			0.849256	0.860399
184			0.847067	0.867175
185			0.845896	0.862093
186			0.844726	0.85701
187			0.838482
188			0.837311	0.852493
189			0.833409	0.852493
190			0.831848	0.844586
191			0.825995	0.842328
192			0.821312	0.83668
193			0.822092
194			0.816629	0.824821
195			0.811946
196			0.810385	0.825951
197				0.821998
198			0.806483	0.820868
199			0.775655	0.810703
200			0.757314
201				0.802797
202				0.799409
203			0.769021	0.797715
204			0.771753	0.797715
205			0.769021	0.78868
206			0.761997	0.785856
207			0.756924	0.784162
208			0.753022	0.775691
209			0.756924	0.76722
210				0.75875
211			0.771753	0.769479
212			0.725316	0.773432
213			0.735071
214			0.729608	0.753667
215				0.75762
216				0.750844
217			0.722194	0.751408
218			0.726486	0.74802
219				0.734467
220				0.737855
221				0.728255
222
223				0.731643
224				0.723172
225				0.725996
226			0.719072	0.721478
227			0.722974	0.713008
228			0.683561	0.710749
229			0.66405	0.705666
230			0.644928	0.705101
231			0.633612	0.698325
232			0.633222	0.695501
233			0.635563	0.694937
234			0.609808	0.695501
235
236			0.624246	0.681948
237			0.615271	0.67856
238			0.609027	0.675736
239			0.603174	0.671783
240			0.603564	0.66896
241			0.59693	0.672348
242			0.592248	0.666136
243			0.588345	0.65823
244			0.585223	0.654277
245			0.581321	0.653712
246			0.58015	0.64863
247			0.571956	0.644112
248			0.572346	0.644112
249			0.569614	0.63903
250			0.564541	0.631124
251			0.56142
252			0.555956	0.631124
253			0.552834	0.631688
254			0.548542	0.626606
255			0.54581	0.61757
256			0.541128
257			0.540347	0.610794
258			0.539567	0.611923
259			0.532933	0.604017
260			0.530201	0.603453
261			0.526689	0.5995
262			0.521226	0.594982
263			0.519665	0.591593
264			0.516543	0.594417
265			0.513812	0.588205
266			0.51108
267			0.507958	0.584817
268			0.503666	0.582558
269			0.500934	0.58764
270			0.500544	0.58877
271			0.49469
272			0.491569
273			0.489617	0.572393
274			0.486496	0.56957
275			0.484935	0.557146
276			0.482203	0.560534
277			0.481032	0.556016
278			0.47713	0.55771
279			0.47674	0.557146
280			0.472447	0.521004
281			0.470106	0.552063
282			0.468545
283			0.466204	0.536251
284			0.464643	0.541898
285			0.462301	0.535122
286			0.46035	0.532298
287			0.45996
288			0.457619	0.526086
289			0.454887	0.523827
290			0.454107	0.524392
291			0.447083	0.51818
292			0.444351	0.519874
293			0.448253	0.515921
294			0.448253	0.514227
295			0.44279	0.511404
296			0.441229	0.50971
297			0.439278	0.507451
298			0.439278	0.506321
299			0.436937	0.504627
300			0.433815	0.502368
301			0.433425	0.500109
302			0.433425	0.501804
303			0.427181	0.487121
304			0.429132	0.488815
305			0.427571	0.507451
306			0.42562	0.491639
307			0.424059	0.487686
308			0.421718	0.487686
309			0.420937	0.48825
310			0.419376	0.487121
311			0.418986	0.482603
312			0.416645	0.479215
313			0.414694	0.478085
314			0.418206	0.474132
315			0.413523	0.474697
316			0.412352	0.473003
317			0.411181	0.470179
318			0.407669	0.453803
319			0.406499	0.46905
320			0.405718	0.472438
321			0.404548
322			0.398694	0.465097
323			0.399865	0.460015
324			0.399865	0.462838
325			0.399865	0.463968
326			0.397133	0.456626
327			0.395572	0.457191
328			0.396743	0.455497
329			0.393621	0.453803
330			0.394011	0.451544
331			0.39206	0.44985
332			0.390499	0.44872
333			0.39206	0.445897
334			0.387768	0.444202
335			0.386207	0.441944
336			0.387768	0.447591
337			0.385036
338			0.385036	0.42952
339			0.384646	0.454367
340			0.383475	0.45945
341			0.383085
342			0.383865
343			0.379183	0.439685
344			0.379573	0.42952
345			0.377232	0.430649
346			0.377232	0.430085
347			0.37372	0.432908
348			0.379183	0.427261
349			0.37372	0.431214
350			0.373329	0.42839
351			0.372549	0.428955
352			0.3745	0.42952

## Sheet: Figure 3 - fig. supp. 1 I
	Electrochemical glucose signal
1	1.00431	1.0036	1.00075	1.0003
3	1	1.00057	0.99467	0.990021
5	0.999379	0.996139	0.998535	0.965135
7	0.996316	1.00504	1.00015	0.951593
9	0.997526	1.00937	1.0007	0.948852
11	0.99571	1.00142	0.990404	0.942983
13	0.997291	0.989871	0.989296	0.922778
15	0.995845	0.991747	0.982454	0.943113
17	0.991243	1.13463	0.986994	0.946044
19	0.992926		0.985464	0.949052
21		0.989905	0.979382	0.947553
23			0.980886	0.948153
25		0.800546	0.980115	0.948053
27	0.979674		0.978585	0.95145
29	0.995005	1.42692	0.977055	0.954303
31	1.00059		0.977801	0.957719
33	1.00023	0.946712	0.973236
35	1.00385		0.974741
37	1.0024	0.903673	0.973211	0.985117
39	0.998797	0.653393	0.971849	0.96204
41	0.996841	0.870076	0.9527	0.95215
43	0.994778	1.01783	0.965585	0.949253
45	0.993777	1.06962	0.989852	0.959098
47	0.992668	1.00741	0.985287	0.968633
49	0.996711	1.01754	0.969341	0.962939
51	0.990716	1.0179	0.967811	0.964937
53	0.988996	0.948848	0.968557	0.965537
55	0.991425		0.969303	0.966136
57	0.991661	1.06188	0.967773	0.966736
59	0.980275	1.04509	0.971554	0.964538
61	0.98689	1.01825	0.965472	0.967935
63	0.988725		0.965459	0.967136
65	0.991914	1.12243	0.966964	0.971232
67	0.992368	1.03794	0.966951	0.970433
69	0.991547	1.00744	0.963145	0.968934
71	0.985654		0.965408	0.966736
73	0.988927		0.969189	0.97363
75	0.988151	1.26931	0.967659	0.968635
77	0.98924	0.972929	0.962336	0.969933
79	0.992558	0.94009	0.965358	0.970533
81	0.997814	0.935424	0.96857	0.967636
83	0.996246	0.943073	0.88946	0.966837
85	0.995448	0.957508	0.890965	0.969534
87	0.998534	0.964471	0.928888	0.969434
89	0.997036	0.972319	0.96226	0.968635
91	0.996502		0.969834	0.967137
93	0.998781	0.918892	0.969822	0.967037
95	1.00154		0.97689	0.970434
97	1.01404	0.938821	1.0745	0.969635
99	0.999723	0.981824	1.02384	0.952752
101	0.998656	0.99769	0.981152
103	1.03983	1.02575	0.972035
105		1.01745	0.965025
107	0.888943	1.00758	0.965181
109	0.955351	1.00806	0.971238
111	0.993762	1.00844	0.972743
113	1.00461	0.999879	0.971971
115	1.00864	0.987774	0.970441
117	0.980434	0.999827	0.96967
119	1.01783	1.01932	0.973451
121	1.0376	1.02841	0.973438	0.910395
123		1.01999	0.975702	0.931973
125	1.00965	1.01379	0.976448	0.92558
127	1.01377	1.01241	0.9734	0.910795
129	1.00804	1.01142	0.97794	0.914891
131	0.996938	1.01082	0.977169	0.921784
133	1.00007	1.00079	0.978673	0.930775
135	1.00274	1.00639	0.977902	0.939067
137	1.00695	0.99985	0.977889	0.943862
139	1.01038		0.980153	0.947958
141	1.0028	1.088	0.981658	0.949257
143	1.00108		0.980128	0.951954
145	0.968625		0.980115	0.949757
147	0.963644		0.983896	0.965391
149	0.98119		0.986159	0.962494
151	0.991694		0.982353	0.955052
153	0.994205	0.957518	0.986893	0.960546
155	0.993178	0.989674	0.987639	0.952055
157	0.99292	0.990103	0.983074	0.954053
159	0.989636	1.01939	0.987614	0.95238
161	1	1	1	1
163	1.01554	1.0014	1.00389	1.00613
165	1.00833	1.0065	1.01181	1.00212
167	1.00935	1.00774	1.0094	1.00118
169	1.016	1.007	1.00993	0.97719
171	1.01113	1.01123	1.0173	0.985474
173	0.967927	1.0116	1.01489	1.0368
175		1.01566	1.02617	1.01895
177		1.0165	1.01985	1.01217
179	1.03126	1.01599	1.01353	1.01093
181		1.02234	1.01797	0.988471
183	1.13315	1.02041	1.02436	1.03518
185	1.09311	1.02225	1.02293	1.02195
187	1.10532		1.02248
189	1.08267		1.02301	1.07848
191	1.07212	0.616607	1.02744	1.05244
193	1.0627		1.02797	1.02803
195	1.02791		1.03045	1.01572
197	1.03381		1.02218	1.01079
199	1.04007	0.957855	1.03248	1.01139
201	1.04669	1.03283	1.0291	1.01475
203	1.04355	1.06792	1.0306	1.01351
205	1.06465	1.08339	1.02678	1.01411
207	1.06227	1.08239	1.02774	1.02301
209	1.06043	1.08382	1.03413	1.01623
211	1.06223	1.07257	1.03173	1.01437
213	1.05911	1.06873	1.0391	1.00926
215	1.06683	1.0721	1.02887	1.02171
217	1.06052		1.03037	1.03338
219	1.05626	1.16545	1.04165	1.02015
221	1.05006	1.17208	1.03435	1.00404
223	1.05145	1.09289	1.04173	0.975365
225	1.05309	1.0509	1.04127	0.987822
227	1.05158	1.03544	1.04033	0.988421
229	1.05063	1.03135		0.952131
231	1.05752	1.03946	1.03221
233	1.05619	1.03599	1.05
235	1.05434	1.03591	1.07323
237	1.05459	1.03811	1.05953	0.982195
239	1.05711	1.03581	1.04691
241		1.04269	1.04841	0.974172
243	1.13049	1.04296	1.05089	1.09351
245	1.06006	1.04295	1.05685	1.07286
247	1.07397	1.03375	1.05075	1.0811
249	1.06295	1.03701	1.03705	1.06264
251	1.0388	1.03234	1.04615	1.04818
253	1.04043	1.03011	1.06302	1.055
255	1.05004	1.03033	1.07483	1.05522
257	1.05473	1.03109	1.07239	1.02692
259	1.05098	1.03493	1.06412	1.03582
261	1.05883	1.02797	1.0591	1.0437
263	1.0573	1.02392	1.06007	1.04532
265	1.04632	1.01695	1.0645	1.04961
267	1.03646		1.06503	1.04099
269	1.04153	0.846746	1.06849	1.05327
271	1.04079	0.969565	1.06217	1.19528
273	1.04261	0.972971	1.06661	1.12671
275	1.03774	1.00184	1.0642	1.02279
277	1.03807	0.998506	1.07059	1.01954
279	1.03567	1.01274	1.07307	1.01586
281	1.03407	1.02215	1.0736	1.02305
283	1.02624	1.0184	1.0751	1.07529
285	1.03502	1.00888	1.06976	1.03244
287	1.04391	0.995688	1.06996	1.02075
289	1.0365	0.996424	1.08646	1.02135
291	1.02832		1.08698	1.0325
293	1.0206	1.01657	1.08066	1.04693
295	1.01919	1.01233	1.07435	1.0503
297	0.98438	0.960736	1.07976	1.03799
299	1.01609	0.961069	1.07386	1.03254
301	1.02354	0.961322	1.06908	1.03621
303			1.07873	1.03702
305			1.09555	1.05264
307			1.09586	1.03914
309			1.09074	1.03246
