# Supplementary material for: Microtubule-mediated GLUT4 trafficking is disrupted in insulin-resistant skeletal muscle
Source: eLife journal article supplement (doi:10.7554/elife.83338), 2023-04-19
Supplement: fig4-data1 [file elife-83338-fig4-data1-v2.zip]

## Sheet: Figure 4 B
			Soleus				Edl
			DMSO		Kinesore		DMSO		Kinesore
			Basal	Insulin	Basal	Insulin	Basal	Insulin	Basal	Insulin
			2.25	4.13	1.65	2.12	1.6	2.33	2	2.26
			1.48	3.85	2.19	2.66	2.08	1.71	1.83	1.81
			0.88	3.75	1.46	1.61	0.75	2.19	1.13	1.5
			0.75	4.08	0.96	1.92	1.07	2.46	1.44	1.32
			0.99	3.58	0.75	1.97	1.31	2.13	1.49	1.62
			1.28	2.97	0.98	1.58	1.29	1.71	1.15	1.38
			0.59	3.46	1.3	1.49	0.81	2.09	0.48	0.89
			0.9	2.94	0.9	1.76	1.1	2.35	0.99	1.44

## Sheet: Figure 4 C
DMSO		Kinesore		Noco
Basal	Insulin	Basal	Insulin	Basal	Insulin
52.775	59.1	40.6	45.5	34.15	31.925
52.35	58.175	39.475	42.275	32.875	31.65
54.925	62.725	37.825	38.125	36.975	38.475
52.525	57.65	39.9	43.825	39.3	40.125
49.65	68.475	36.875	41.325	37.425	43.1

## Sheet: Figure 4 D
	shScramble										shKIF5B
Basal	0.536439	0.763411	0.98718	0.973062	1.00907	0.973495	0.885346	0.736198	0.739503		0.984911	0.867967	0.717354	0.554922	0.551765	0.703524	0.598713	0.847788	0.633922	0.847788
Insulin	0.984859	1.68813	1.61347	1.38337	1.37827	1.42278	1.3709	1.33213	1.3939		1.04763	1.12666	0.898931	0.87171	1.06392	1.00587	1.03937	1.23075	1.08581	1.23075
Delta GLUT4 translocation	0.44842	0.924715	0.62629	0.41031	0.369203	0.595929	0.654398	0.44929	0.485551		0.062718	0.258692	0.181577	0.316788	0.512152		0.451889	0.382964	0.440656	0.302347
