# Supplementary material for: Microtubule-mediated GLUT4 trafficking is disrupted in insulin-resistant skeletal muscle
Source: eLife journal article supplement (doi:10.7554/elife.83338), 2023-04-19
Supplement: fig4-figsupp1-data1 [file Figure 4 - figure supplement 1 - source data 1.xlsx]

## Sheet: Figure 4 - fig. supp A
Akt 473 - SOL	DMSO								Kinesore
Basal	0.128736	0.034887	0.023399	0.068363	0.05332	0.068708	0.037688	0.029887	0.112753	0.114064	0.042903	0.076857	0.063571	0.100569	0.034051	0.090662
Insulin	1.71151	1.59212	2.62594	2.28806	1.9363	2.19152	1.79914	2.07191	2.01411	1.2072	2.39239	1.99132	1.39162	1.7698	1.52618	2.41048
Akt 473 - EDL
Basal	0.098295	0.163516	0.02575	0.061326	0.160169	0.022149	0.038293	0.047795	0.190606	0.173658	0.16991	0.22501	0.201142	0.199293	0.102281	0.154412
Insulin	1.84612	1.58075	2.12901	2.02947	1.86252	1.52541	2.02389	2.07432	1.84613	1.79807	1.97819	1.98861	1.85997	1.86492	1.68311	1.8759
TBC1D4 Thr642 - SOL
Basal	0.245455	0.177753	0.08538	0.2199	0.26419	0.165846	0.11032	0.247726	0.476571	0.515631	0.282049	0.454318	0.520397	0.474683	0.239611	0.476464
Insulin	1.56858	1.76387	1.70127	2.04979	1.4901	1.18423	1.18877	1.90141	2.1955	1.98794	1.98955	1.87519	1.49605	1.27748	1.33274	2.04125
TBC1D4 Thr642 - EDL
Basal	0.133259	0.192056	0.14946	0.160132	0.224643	0.206147	0.093462	0.104486	0.353536	0.574284	0.215887	0.200815	0.316734	0.365553	0.093501	0.278223
Insulin	2.17906	1.71316	1.92195	2.12527	2.01254	1.71756	1.71799	1.72988	1.8431	1.72425	1.6967	2.07017	1.6213	1.37085	1.35889	1.53515

## Sheet: Figure 4 - fig. supp B
AMPK Thr172 - SOL	DMSO								Kinesore
Basal	1.0068	0.245523	0.258809	0.494894	0.419112	0.261917	0.574185	0.587134	1.86474	0.965116	0.678732	1.9437	1.41566	1.16112	1.08263	1.50293
Insulin	2.12336	0.688371	0.287708	0.523664	0.491701	0.424168	0.771587	0.608705	1.7581	1.12274	1.92345	1.35874	1.00603	1.66755	1.41022	1.37089
AMPK Thr172 - EDL
Basal	0.487933	0.694419	0.204832	0.503135	0.707014	0.251988	0.360468	0.639271	1.10768	0.727992	0.860167	1.86641	0.967744	1.52304	0.824427	1.39534
Insulin	1.81247	0.997593	0.324239	0.294043	0.439891	0.733176	0.500989	0.167674	2.49364	1.28903	1.63934	1.55042	1.25698	2.74269	1.15112	1.48485
ACC Ser222 - SOL
Basal	1.13539	0.384015	0.517556	0.558353	0.609417	0.683139	0.551602	0.823243	1.6264	0.899346	1.29167	1.122	1.71371	1.68144	0.845321	1.3765
Insulin	0.720763	0.770927	0.617458	0.52192	0.595688	0.489733	0.770539	0.87102	1.22882	1.80766	1.21527	0.630323	1.66873	1.46241	1.31677	1.49286
ACC Ser222 - EDL
Basal	0.891642	0.536422	0.227762	0.325309	0.338679	0.284574	0.483112	0.344089	1.2036	1.34137	0.934087	1.20481	1.22589	1.64397	1.01374	1.2313
Insulin	1.30537	0.958004	0.549495	1.18992	0.323469	0.687625	0.50668	0.434901	1.6863	1.36595	1.25675	1.33811	1.86851	2.07682	1.52363	1.69811

## Sheet: Figure 4 - fig. supp. 1 C
shScramble						shKIF5B
1.17355	1.88581	1.44076	1.56106	1.3133	1.51753	0.462122	0.403236	0.712794	0.401391	0.563399	0.565063

## Sheet: Figure 4 - fig. supp. 1 E
	0						0.05						0.5						5						50
Basal	0.5102	0.74786	0.66733	0.88888	0.718473	0.830883	0.702464	0.500161	0.551228	0.754639	0.769953	1.01139	1.19131	0.931174	1.52892	0.935799	0.854994	0.862162	1.1302	1.39361	1.62385	1.2802	1.09024	1.14107	1.87722	1.36153	1.54092	1.12022	1.25543	1.34471

## Sheet: Figure 4 fig. supp F
	DMSO						Kinesore
Basal	0.49228	0.50147	0.502554	0.378537	0.38978	0.391107	0.89201	1.0618	0.967948	0.867814	1.07565	0.960767
Insulin	1.33778	1.41143	1.24615	1.41345	1.50361	1.30129	1.73893	1.79672	1.71462	1.90447	1.97522	1.87472

## Sheet: Figure 4 - fig. supp. 1 G
	DMSO						Kinesore
Basal	2.64059	2.48227	2.46937	2.4859			4.53667	4.13416	4.17468	4.12521	4.10022
Insulin	4.24333	3.67821	4.01863	4.6426			5.1011	5.35511	4.984	5.08025	5.08859

## Sheet: Figure 4 - fig. supp H
	DMSO						Kinesore
Basal	0.528677	0.551947	0.58451	0.58462	0.54266		0.968225	1.00206	0.870413	0.94409	0.95257	0.96627
Insulin	0.939839	1.11313	1.14104	1.12821	1.11213		1.36805	1.38439	1.27327	1.33537	1.36701	1.34152

## Sheet: Figure 4 - fig. supp. 1 I
Akt 473	DMSO						Kinesore
Basal	0.02281	0.00885	0.03161				0.01428	0.01809	0.01359
Insulin	1.99088	1.25558	1.80098				2.41792	1.94599	2.47943
Akt 308
Basal	0.02552	0.02622	0.0085				0.0125	0.01962	0.00708
Insulin	1.70287	1.30707	1.81662				2.57203	2.32986	2.17211
AMPK 172
Basal	2.13304	1.43797	0.75017				0.90545	0.66699	0.89085
Insulin	1.43994	0.94477	0.72267				0.77387	0.76524	0.56904
ACC 222
Basal	1.08166	0.95686	0.89358				1.28474	1.1803	1.09751
Insulin	0.99542	0.78915	0.84393				1.0472	0.84026	0.9894
