# Supplementary material for: Microtubule-mediated GLUT4 trafficking is disrupted in insulin-resistant skeletal muscle
Source: eLife journal article supplement (doi:10.7554/elife.83338), 2023-04-19
Supplement: fig5-figsupp1-data1 [file Figure 5 - figure supplement 1 - source data 1.xlsx]

## Sheet: Figure 5 - fig. supp. 1 A
Basal	Insulin	Basal+PA	Insulin+PA	Insulin+C2
0.00386	1.74212	0.057184	1.88074	0.762349
0.196236	2.32834	0.103711	3.53703	0.429775
0.149431	1.60941	0.005913	2.06946	0.12444

## Sheet: Figure 5 - fig. supp. 1 B
Travel distance	Basal	Insulin	Insulin+C2		Displacement	Basal	Insulin	Insulin+C2
	32.169	187.262	147.828			2.34417	2.00418	1.99011
	282.126	97.7797	51.0799			1.86346	1.845	2.188
	136.716	82.4962	101.836			2.03893	1.886	2.567
	102.656	122.573	74.4461			1.9334	1.75882	1.647
	107.674	128.18	40.8832			1.838	1.77719	1.532
	149.543	77.7258	59.7944			1.8565	1.78475	1.84
	123.432	212.716	30.7238			2.02297	2.06723	1.632
	137.792	250.206	40.633			2.21965	1.90492	1.8175
	42.8377	84.4159	73.8893			1.6605	1.98167	2.28983
	79.2414	190.221	131.681			2.04575	1.85356	2.00483
	127.518	131.352	59.4347			1.8444	1.78831	1.9913
	228.068	104.609	85.9885			1.95156	1.72314	2.022
	76.7291	223.221	78.0737			1.88133	1.95063	1.8756
	181.456	176.66				2.0609	1.90064
	139.434	95.2664				1.82713	1.89786
	40.0414	203.301				2.25067	1.94494
	114.84					1.76625	1.84613

## Sheet: Figure 5 - fig. supp. 1 C
Time	Chow					HFD						AUC	Chow					HFD
0	9.9	9	8.6	8.2		9.8	9.2	8.9	10.8				221.25	162.75	159.75	107.25		785.25	700.5	744.75	835.5
15	16.6	15.1	18.4	17.1		22.3	21.6	21	23.4
30	13.8	11.5	12.8	10.4		22	21.3	18.3	22.6
45	11.2	12.3	9.5	11.6		16.1	22.2	22.4	21.5
60	12.2	10.3	10.4	9.4		24.8	16.6	22.2	22.2
75	11	13.3	9.5	8.1		23.5	19.8	21.6	20.2

## Sheet: Figure 5 - fig. supp. 1 D 
Time	Chow					HFD							Chow					HFD
0	1	1	1	1		1	1	1	1			AUC	48.3803	52.8409	59.8828	56.5299		-39.9609	41.8868	12.5	3.79032
15	0.816901	0.848485	0.84375	0.791045		1.59375	0.830189	1.16129	1.23656
30	0.661972	0.772727	0.734375	0.567164		1.42188	0.575472	0.892473	1.02151
45	0.619718	0.590909	0.515625	0.626866		1.28125	0.603774	0.849462	0.956989
60	0.619718	0.469697	0.359375	0.507463		1.20312	0.745283	0.83871	1.01075
90	0.535211	0.484848	0.453125	0.492537		1.26562	0.603774	0.924731	0.795699
120	0.535211	0.530303	0.5	0.522388		1.53125	0.641509	0.795699	0.88172

## Sheet: Figure 5 - fig. supp. 1 E
		Chow					HFD
Akt 308	Basal	0.214013	0.481639	0.669726	0.713689		0.757579	0.179021	0.265261	0.1786
	Insulin	3.08226	2.86546	3.79386	2.83906		1.84948	1.30213	2.7638	1.14734
TBC1D4 642	Basal	0.708489	0.769853	0.862764	0.753312		0.716719	0.53723	0.30745	0.911111
	Insulin	2.6208	1.8843	1.1467	1.88102		1.11628	0.476338	1.12032	1.00956

## Sheet: Figure 5 - fig. supp. 1 F
Total travel distance	Chow		HFD			Displacement	Chow		HFD
	Basal	Insulin	Basal	Insulin			Basal	Insulin	Basal	Insulin
	39.2573	79.3718	78.8719	110.779			1.83867	1.68743	2.00914	2.07914
	80.2822	54.6724	36.4492	30.7048			1.92265	2.10669	2.01919	1.5135
	18.8732	28.034	61.6827	70.4278			1.514	1.915	1.9615	1.80337
	42.9449	182.442	18.9669	128.819			1.85933	1.91959	1.81215	2.02596
	221.721	207.34	30.376	17.6685			1.83597	1.96643	1.80875	2.5105
	87.6944	95.1945	8.48583	34.7277			2.15633	1.90476	1.85133	2.012
	86.8261	34.261	29.5329	51.6605			2.02113	2.3405	1.80275	1.623
	96.5526	58.6953	40.6439	80.3737			1.88348	1.81525	2.054	2.08456
	54.1642	30.3627	47.4507	19.0965			1.91835	2.33208	2.10814	2.425
	31.3308	90.8706	93.0657	41.5446			1.94467	2.26788	1.89105	2.10171
	55.0808	111.799	153.677	14.2954			1.7318	2.11213	1.77877	1.9433
	50.117	115.414	146.791	30.981			1.91557	1.93827	1.9098	1.843
	53.555	67.463	34.483	46.3			1.6945	1.87045	1.729	1.897
	40.389	38.28	23.692				1.7995	2.0435	1.544
	74.859	13.532	145.086				1.935	1.702	2.2142
	39.488	111.44					2.1055	1.67
	198.353	56.856					2.11675	2.31844
	116.077	134.83					1.81573	1.581
		190.884						1.776
		80.363						2.21169
		103.354						1.81375
		112.635						1.922
		121.361						1.89958
		38.91						2.11646
		191.853						1.87267
		76.568						1.82208
		107.931						1.6945
								1.6425

## Sheet: Figure 5 - fig. supp. 1 H
Polymerizing distance	Basal	Basal+C2	INS	INS+C2	Basal+Taxol		Basal	Basal+C2	Insulin	Insulin+C2	Basal+Taxol
	38.787	39.3051	28.2388	12.9886			4.31767	3.71261	5.21419	3.9296
	58.2079	20.9144	53.9712	34.515			4.11848	4.63253	3.43836	3.70089
	16.6623	23.7803	59.181	7.03169			4.67168	3.975	4.9075	3.54233
	42.9833	8.8775	13.8681	19.185			4.27695	3.78417	4.42484	3.70129
	94.0025	30.6517	21.6748	10.0674			4.6924	3.85975	3.82982	4.83233
	33.7853	58.0889	123.084	16.0526			3.55129	4.814	4.99919	5.53538
	92.1075	28.7724	41.6812	19.2344			4.26646	5.15326	4.45673	2.79967
	42.0827	19.6962	30.4951	10.3384			4.56775	3.2827	4.58057	4.74924
	28.7275	14.0153	91.6602	95.7815			4.59733	2.70392	4.30673	5.08445
	21.24	81.2918	24.4297	16.1906			4.06209	3.78688	3.95431	4.99296
	19.6919	5.83326	40.6268	70.481			5.0082	2.71314	2.99161	3.79467
	9.95212	25.2659	37.1705	20.2423			4.31696	3.469	3.521	5.25978
	28.451	14.2867	44.7246	11.5459			4.19322	4.13355	3.01991	3.7139
	44.8112	67.8591	65.4906	29.3307			5.50665	4.69848	3.12848	3.9952
	87.7605	34.8471	36.9436	13.5557			3.45587	4.59924	3.356	3.41257
	17.778	30.5083	35.2475	11.9322			3.84915	3.86606	5.21656	5.69529
	20.5697	32.2172	112.439	25.8036			3.98123	3.68994	5.3465	3.4092
	69.1495	64.8815	102.78				3.16957	3.81971	4.70784
	15.576	20.8811	34.574				3.48717	4.13254	4.51118
	40.6876	35.8154	27.5192				4.49587	3.98825	5.27829
	12.3045	1.26295	39.2981				3.37557	4.62957	4.69315
	19.4243	17.5924	105.677				5.0915	3.82679	5.43315
	89.5734		81.8595				3.75954		4.56518
	34.6254		80.1951				4.75611		3.75296
	31.5521		86.6934				4.38296		5.2619
	60.7662						4.76858
	78.137						3.78524
	31.1696						3.95523

## Sheet: Figure 5 - fig. supp. 1 I
Polymerizing distance					Avg. Polymerizing distance
Chow		HFD			Chow		HFD
Basal	Insulin	Basal	Insulin		Basal	Insulin	Basal	Insulin
76.0678	162.15	76.9054	78.36		3.7782	3.3502	2.689	3.11364
175.163	138.13	110.453	57.47		3.26594	3.00283	2.90667	2.8735
105.444	96.4969	96.6851	191.324		3.29513	3.8445	3.63478	3.1245
99.0934	268.055	244.832	87.8997		2.6782	3.57406	3.76665	2.7526
28.4988	39.5307	0	69.8658		2.159	2.176	2	2.891
73.6514	107.124	0	89.6671		3.25411	3.0636	2	3.30875
238.831	85.5049	198.504	96.5164		3.56464	3.869	3.38167	3.26436
66.2285	318.92	0	127.708		3.3225	3.50333	2	3.04067
144.792	118.975	88.842	122.555		3.30575	3.342	2.278	2.8435
89.1629	81.9641	75.8581	122.987		2.798	2.91342	3.152	2.9755
123.115	273.442	106.648	79.7184		3.33344	3.64589	3.23175	3.456
123.022	90.351	142.837	113.194		3.84444	3.34633	3.47818	3.88093
127.958	77.13	127.715	272.18		3.071	5.142	3.649	3.9657
122.265	232.374	141.088	295.421		3.23738	3.37263	3.35125	3.47554
		77.405	72.442				3.0962	2.9528
		115.747	106.58				3.55417	2.90144
			235.846					3.36924

## Sheet: Figure 5 - fig. supp. 1 J
Angle	Basal - Chow			Insulin - Chow			Basal - HFD			Insulin - HFD
1	0.485698	0.210313	10	0.346462	0.112042	13	0.425311	0.167696	12	0.386108	0.127977	17
3	0.469502	0.19649	10	0.34283	0.102901	13	0.406801	0.152852	12	0.372865	0.121377	17
5	0.439129	0.166018	10	0.335213	0.098305	13	0.376032	0.127519	12	0.339374	0.113388	17
7	0.403849	0.15625	10	0.327358	0.097414	13	0.355517	0.107737	12	0.319383	0.111538	17
9	0.369421	0.121015	10	0.320387	0.084059	13	0.344942	0.095692	12	0.300706	0.102542	17
11	0.332208	0.109961	10	0.314775	0.06073	13	0.337706	0.083487	12	0.297333	0.095465	17
13	0.303773	0.10345	10	0.306452	0.052104	13	0.327532	0.06933	12	0.279599	0.083015	17
15	0.279344	0.091219	10	0.291713	0.054162	13	0.313156	0.056488	12	0.262916	0.076291	17
17	0.256358	0.070788	10	0.266352	0.053234	13	0.292482	0.046824	12	0.231811	0.081244	17
19	0.234764	0.0547	10	0.235806	0.050586	13	0.266723	0.041382	12	0.208217	0.076513	17
21	0.216615	0.047497	10	0.20809	0.04834	13	0.240831	0.038532	12	0.186347	0.066012	17
23	0.213634	0.054305	10	0.191751	0.048372	13	0.217722	0.034279	12	0.177788	0.054422	17
25	0.213932	0.080342	10	0.187757	0.053295	13	0.197722	0.035774	12	0.169333	0.048849	17
27	0.209848	0.090201	10	0.18943	0.055514	13	0.180562	0.041165	12	0.161905	0.04104	17
29	0.190168	0.087702	10	0.191216	0.055312	13	0.168948	0.039292	12	0.157838	0.047606	17
31	0.166286	0.067091	10	0.186477	0.055166	13	0.164385	0.031937	12	0.154775	0.049669	17
33	0.145801	0.053509	10	0.176553	0.055575	13	0.163762	0.030026	12	0.153887	0.050567	17
35	0.135574	0.05397	10	0.163338	0.055296	13	0.161991	0.032614	12	0.141635	0.046292	17
37	0.1337	0.052236	10	0.153044	0.058417	13	0.156692	0.036259	12	0.133745	0.039979	17
39	0.135011	0.045881	10	0.14832	0.061619	13	0.149222	0.044984	12	0.124527	0.040531	17
41	0.137107	0.047138	10	0.149929	0.059917	13	0.142531	0.059216	12	0.129132	0.04389	17
43	0.130574	0.046364	10	0.153766	0.05472	13	0.135982	0.066374	12	0.11877	0.041896	17
45	0.130204	0.054823	10	0.157659	0.044244	13	0.129223	0.059442	12	0.10943	0.041326	17
47	0.128121	0.050095	10	0.156992	0.030889	13	0.123152	0.042391	12	0.101977	0.034916	17
49	0.138503	0.050975	10	0.153235	0.025113	13	0.121536	0.033864	12	0.113951	0.033345	17
51	0.136905	0.035623	10	0.14546	0.030295	13	0.126493	0.033804	12	0.129549	0.035805	17
53	0.135705	0.036187	10	0.138435	0.034197	13	0.13433	0.03317	12	0.133629	0.042674	17
55	0.128874	0.034443	10	0.133499	0.034142	13	0.1398	0.03236	12	0.135941	0.044165	17
57	0.125894	0.048671	10	0.133183	0.033415	13	0.138554	0.033529	12	0.139046	0.053444	17
59	0.131457	0.048281	10	0.137566	0.031464	13	0.133437	0.037029	12	0.147393	0.058017	17
61	0.132685	0.03722	10	0.143392	0.030049	13	0.129937	0.040848	12	0.14625	0.063837	17
63	0.143871	0.032866	10	0.1497	0.033621	13	0.131675	0.043841	12	0.140432	0.060595	17
65	0.139845	0.037009	10	0.154483	0.03773	13	0.135866	0.045039	12	0.140242	0.059105	17
67	0.141362	0.044981	10	0.160928	0.038266	13	0.138003	0.044785	12	0.147823	0.062766	17
69	0.13671	0.047871	10	0.167366	0.045531	13	0.136718	0.044429	12	0.162203	0.072579	17
71	0.145249	0.041903	10	0.171592	0.061818	13	0.134834	0.045305	12	0.164474	0.072936	17
73	0.157828	0.06328	10	0.173836	0.078812	13	0.133498	0.048909	12	0.166444	0.080812	17
75	0.169333	0.090804	10	0.177001	0.086833	13	0.132283	0.054087	12	0.164118	0.09665	17
77	0.170559	0.101937	10	0.183634	0.085767	13	0.130651	0.058376	12	0.175837	0.111161	17
79	0.168703	0.111207	10	0.188412	0.077757	13	0.131467	0.059934	12	0.19103	0.123783	17
81	0.163739	0.10338	10	0.186328	0.068145	13	0.140199	0.058446	12	0.219591	0.139005	17
83	0.176418	0.10993	10	0.186931	0.061379	13	0.160543	0.061937	12	0.245682	0.153717	17
85	0.187409	0.102529	10	0.1999	0.061742	13	0.190406	0.087008	12	0.249014	0.152713	17
87	0.210589	0.11049	10	0.228081	0.07321	13	0.217835	0.122998	12	0.271308	0.169503	17
89	0.216499	0.106925	10	0.245172	0.082688	13	0.233481	0.147457	12	0.271308	0.169503	17
